# Supplementary material
Source: PubMed Central journal article supplement (PMC3274635)
Supplement: NIHMS248107-supplement-1_si_001.pdf [file NIHMS248107-supplement-1_si_001.pdf]

# A Systematic Study of Thermochromic Aromatic Donor-Acceptor Materials

*Paul M. Alvey,<sup>†</sup> Joseph J. Reczek,<sup>‡</sup> Vincent Lynch,<sup>†</sup> and Brent L. Iverson<sup>\*†</sup>*

Contribution from the Department of Chemistry and Biochemistry, The University of  
Texas at Austin, Texas 78712, and the Department of Chemistry and Biochemistry,  
Denison University, Granville, OH 43023

E-mail: [biverson@mail.utexas.edu](mailto:biverson@mail.utexas.edu)

## **Supporting Information**

### **Contents**

|           |                                                        |
|-----------|--------------------------------------------------------|
| pS1.....  | Cover page                                             |
| pS2.....  | Materials and Methods                                  |
| pS3.....  | NMR spectra for compounds <b>D1-10</b> and <b>N1-5</b> |
| pS33..... | UV-Vis spectra for all crystalline mixtures            |
| pS55..... | References                                             |

## Materials and Methods

All starting materials and solvents were commercially available and used without further purification. NMR spectra were taken on a 400 MHz spectrometer in CDCl<sub>3</sub>. TLC was performed on silica gel plates and column chromatography was carried out using silica gel. Optical microscopy was carried out using standard glass microscope cover slips on a microscope equipped with a hot stage and digital camera. Experimental melting points of the individual components were obtained using DSC and recorded as a temperature range on the second heating cycle at 5°C/min. UV-Vis spectra were taken of equimolar Dan:Ndi mixtures using glass microscope. All compounds were synthesized in a 60-80% yield using modifications of previously reported methods.<sup>1,2</sup> A CEM Microwave Accelerated Reaction System (model MARS®) was used to synthesize the Ndi derivatives.

# NMR Spectra

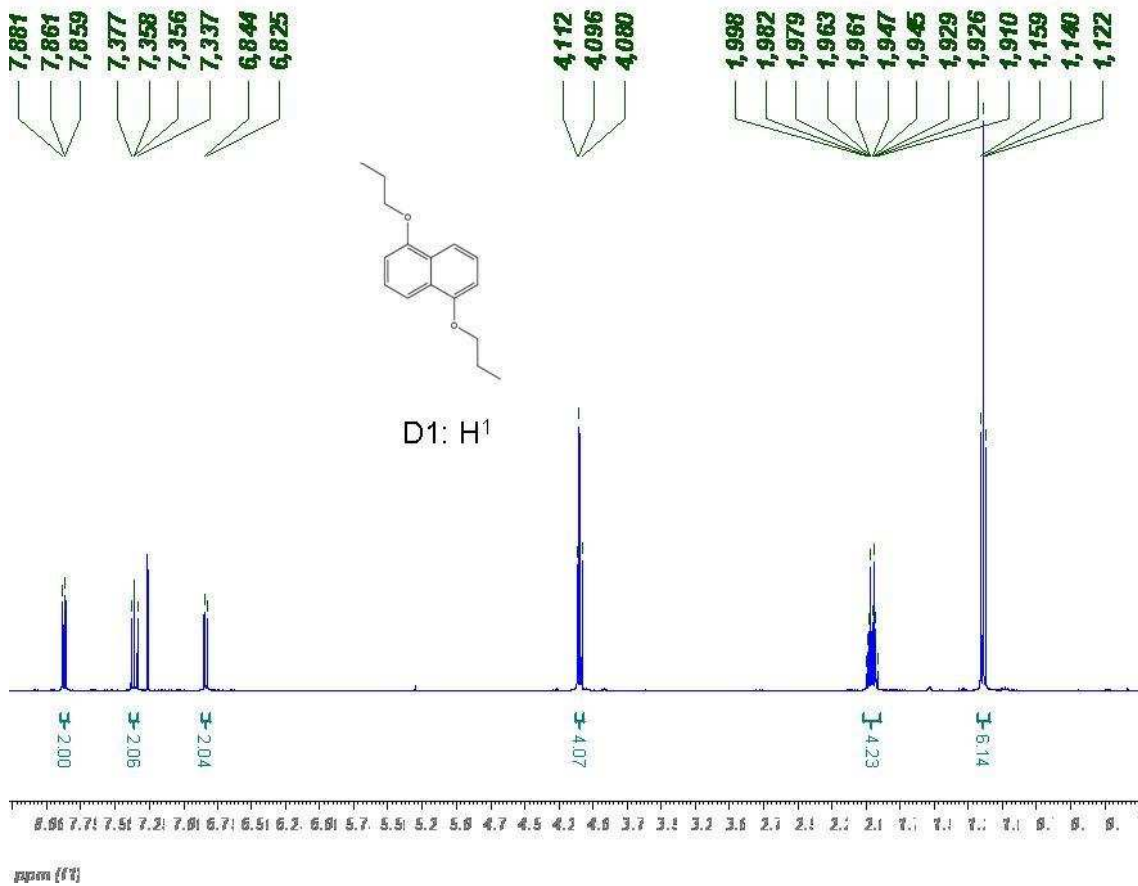

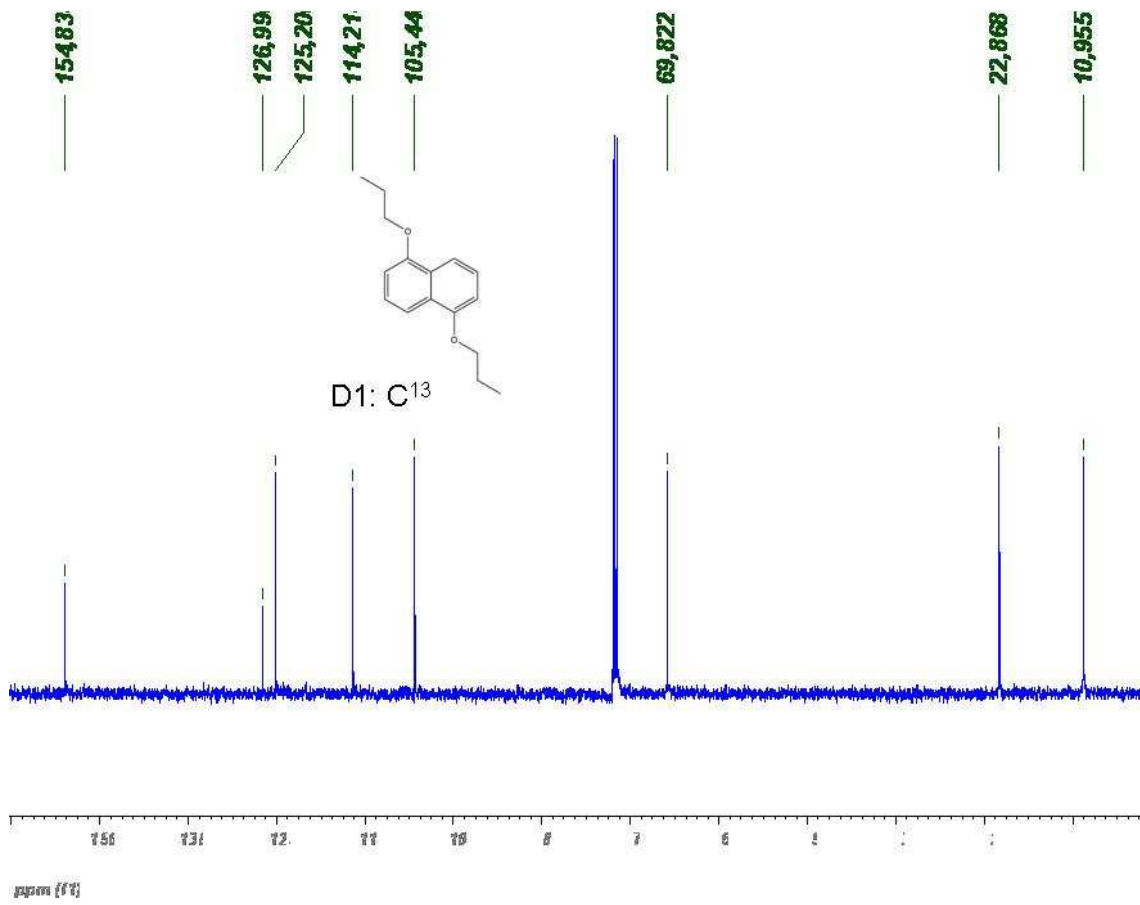

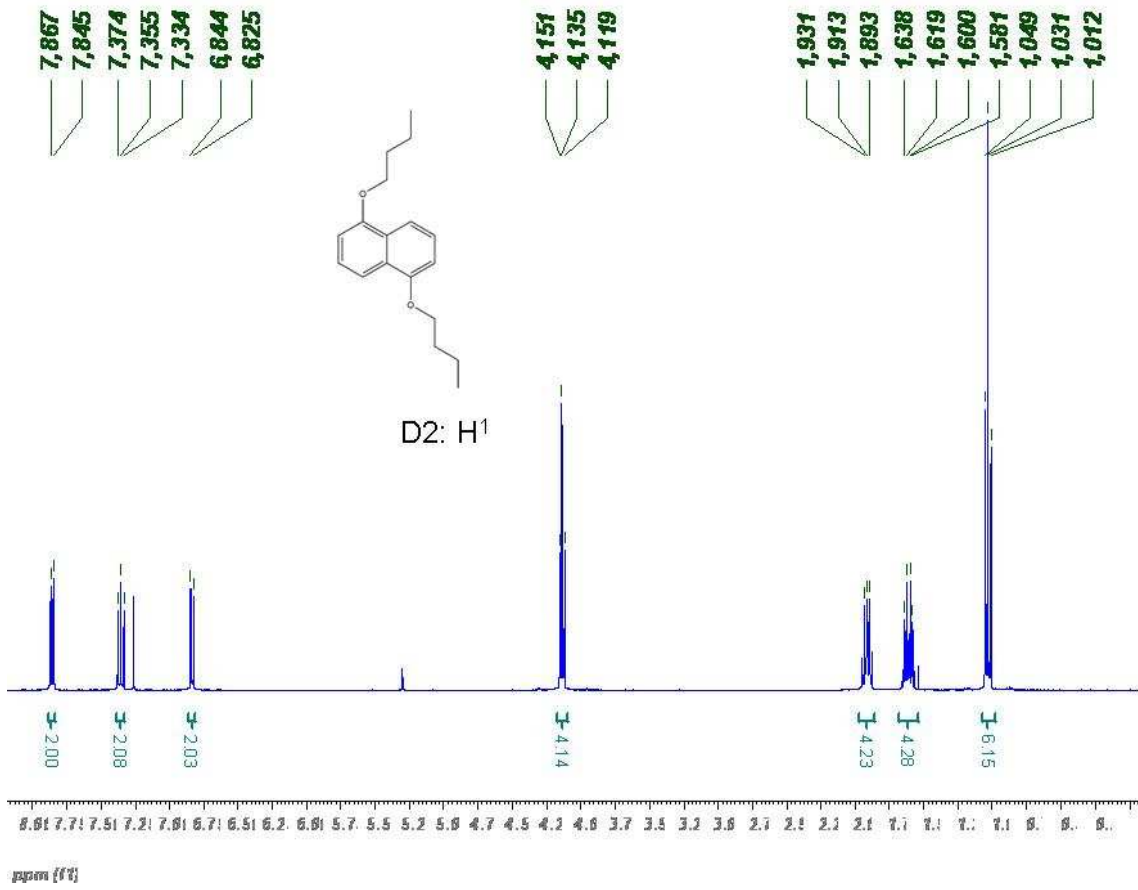

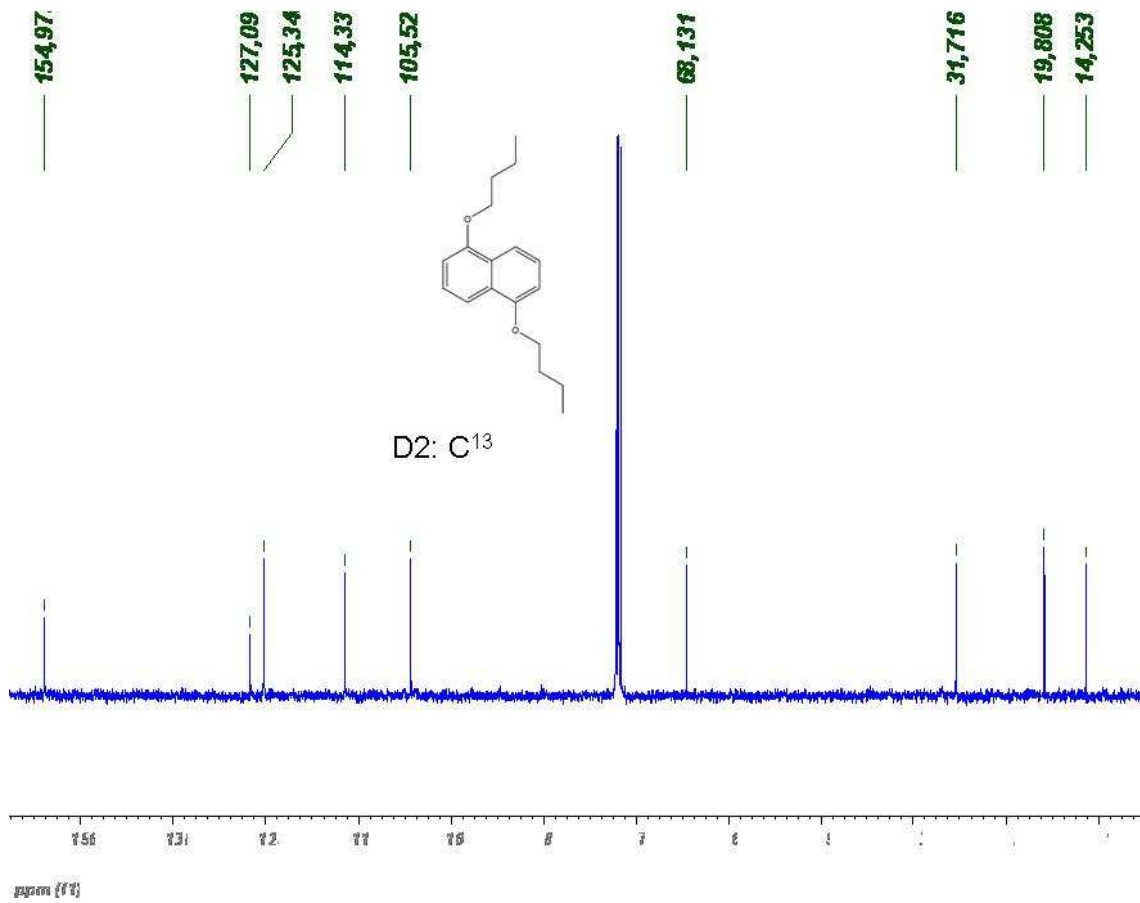

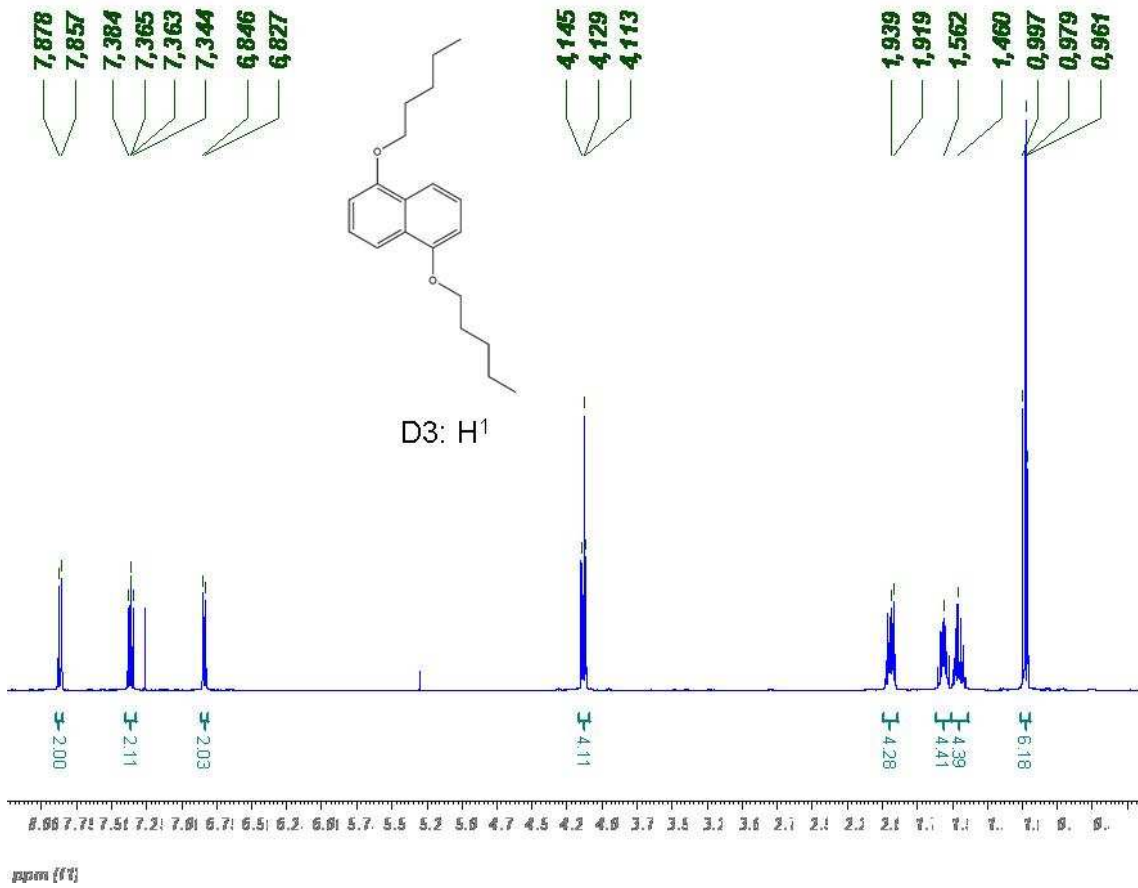

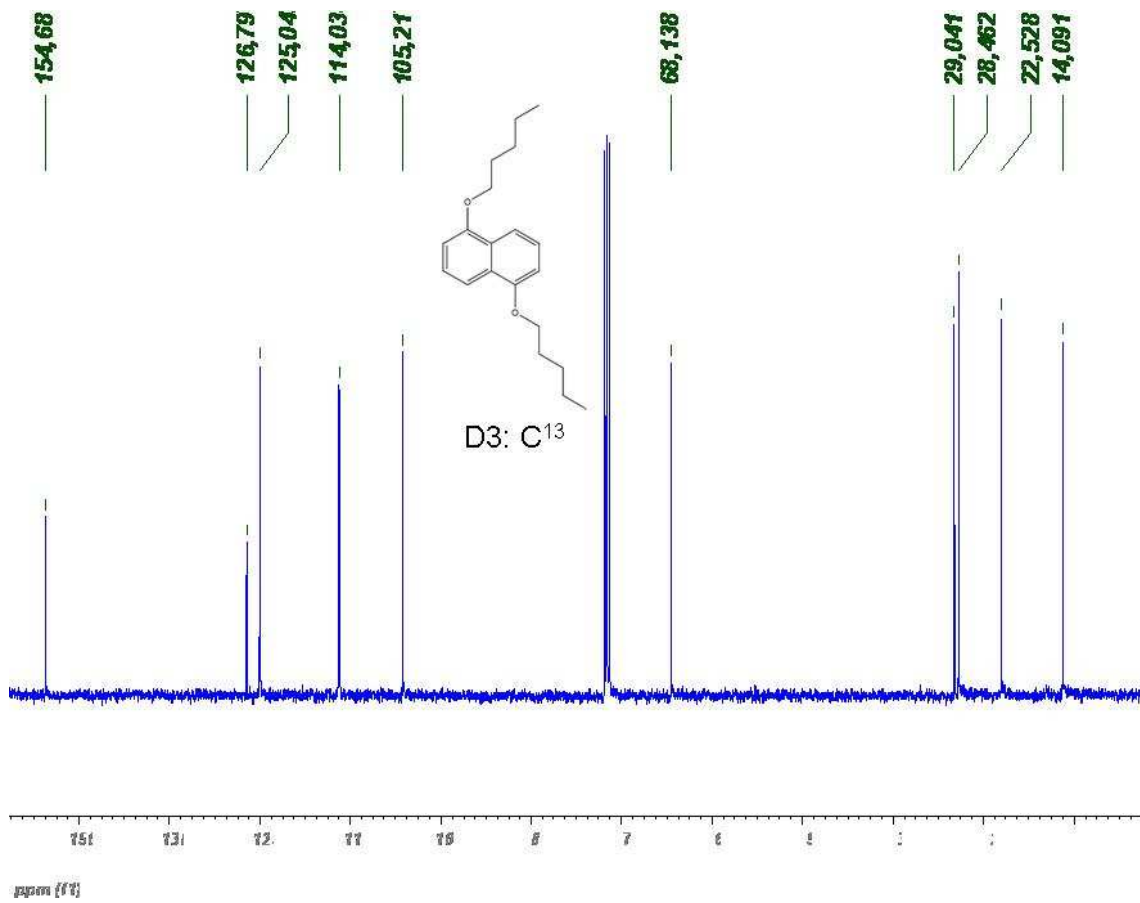



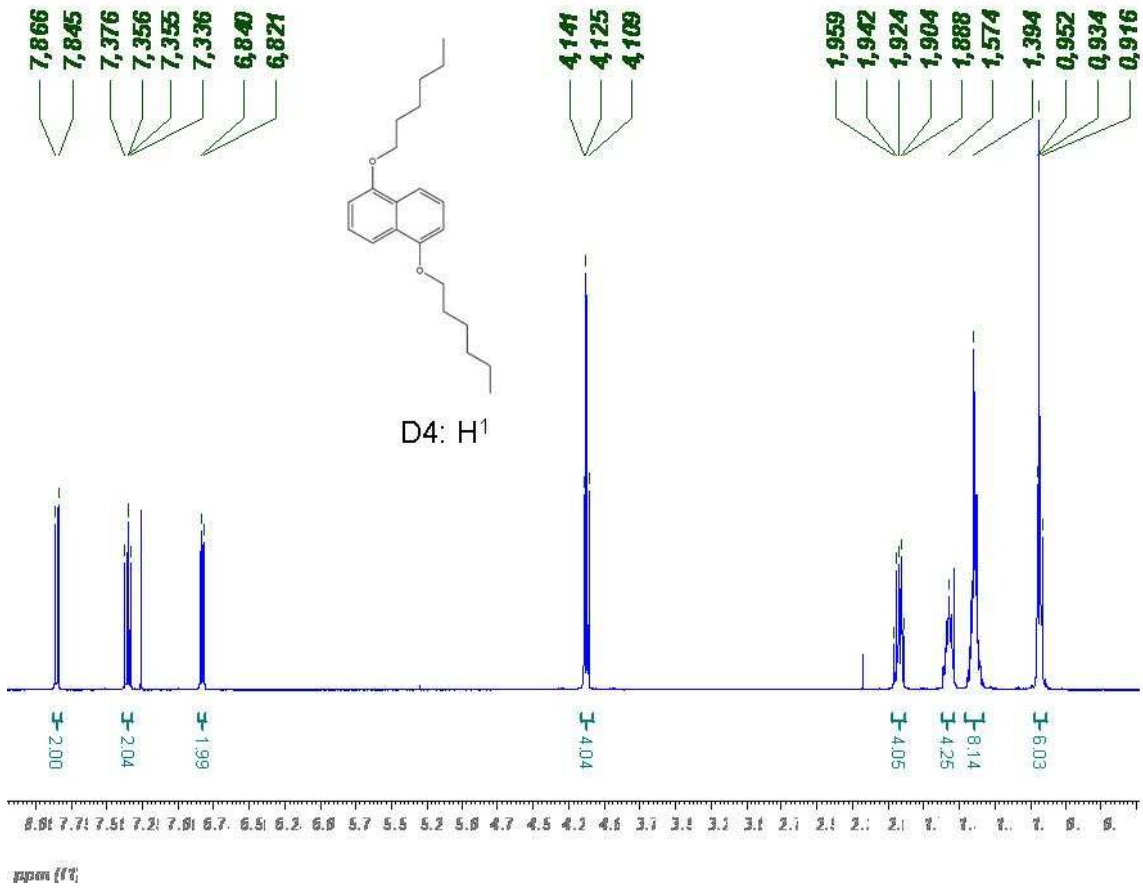

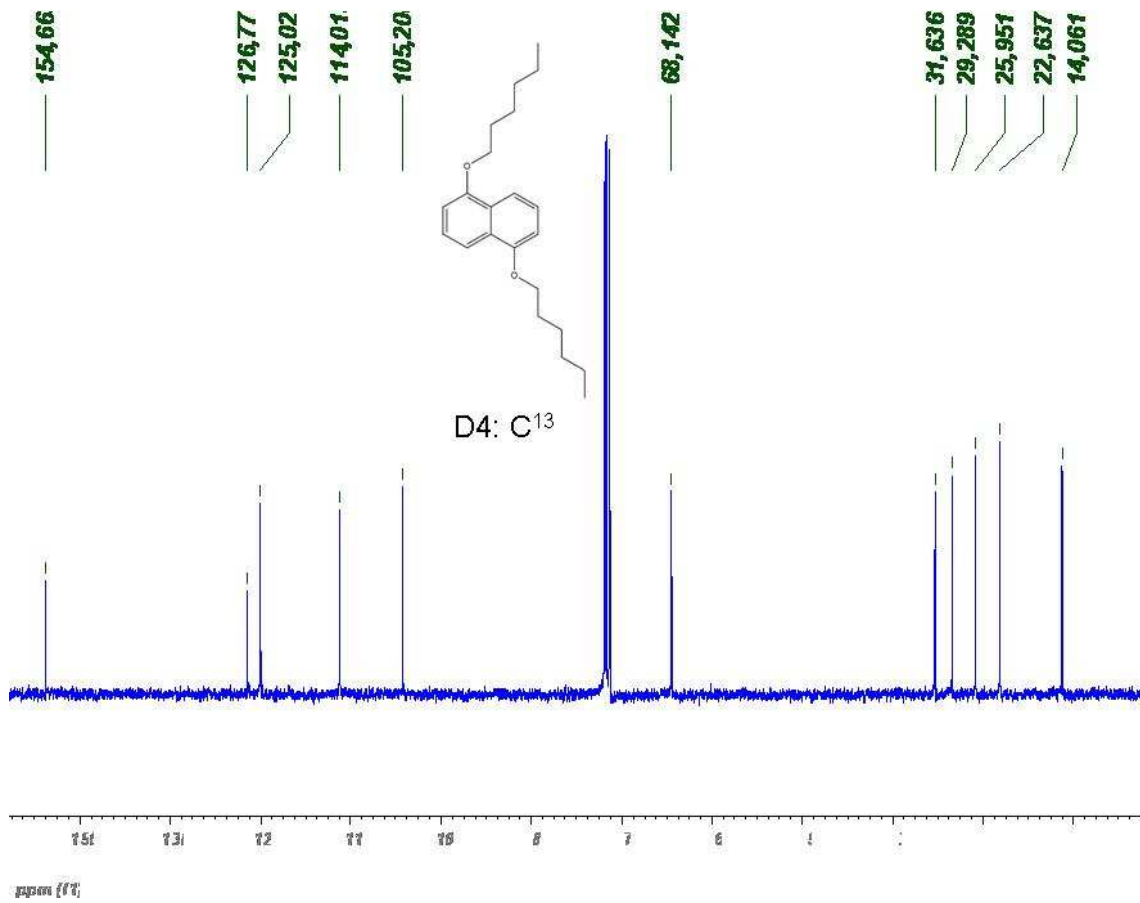

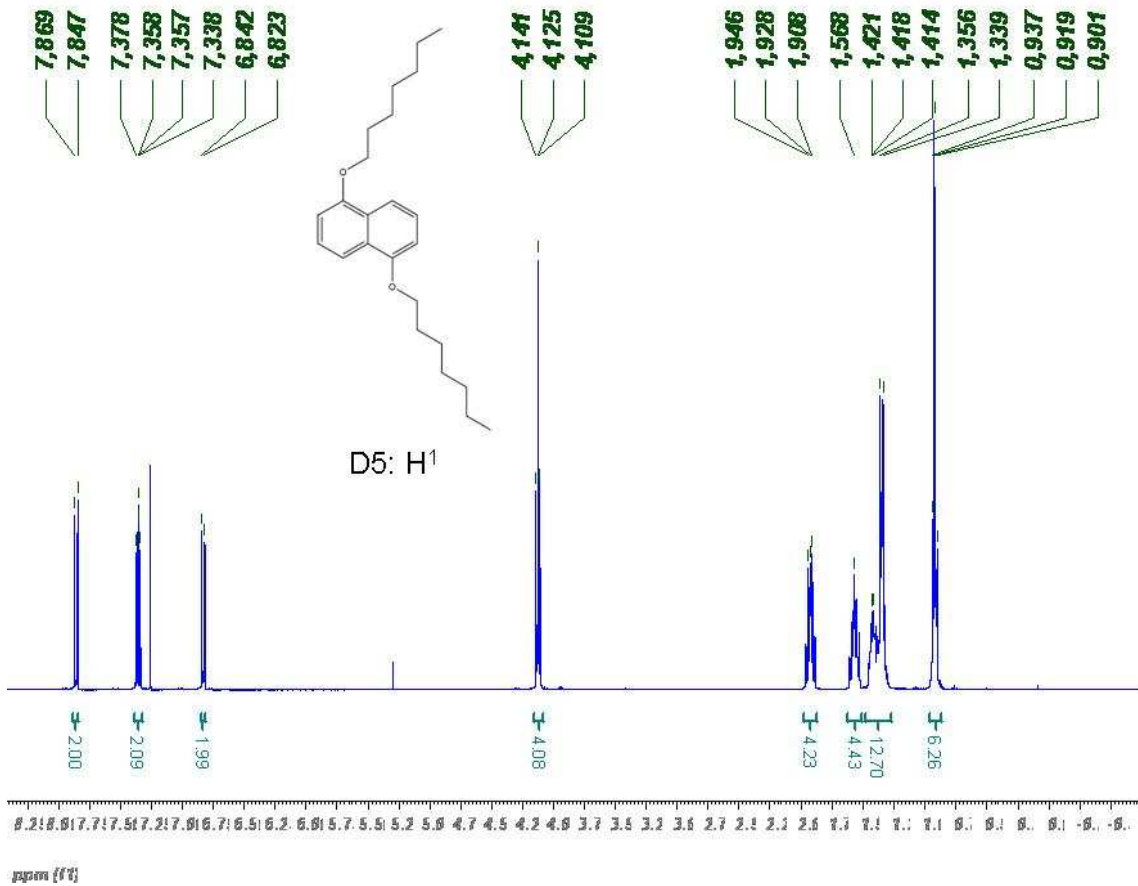

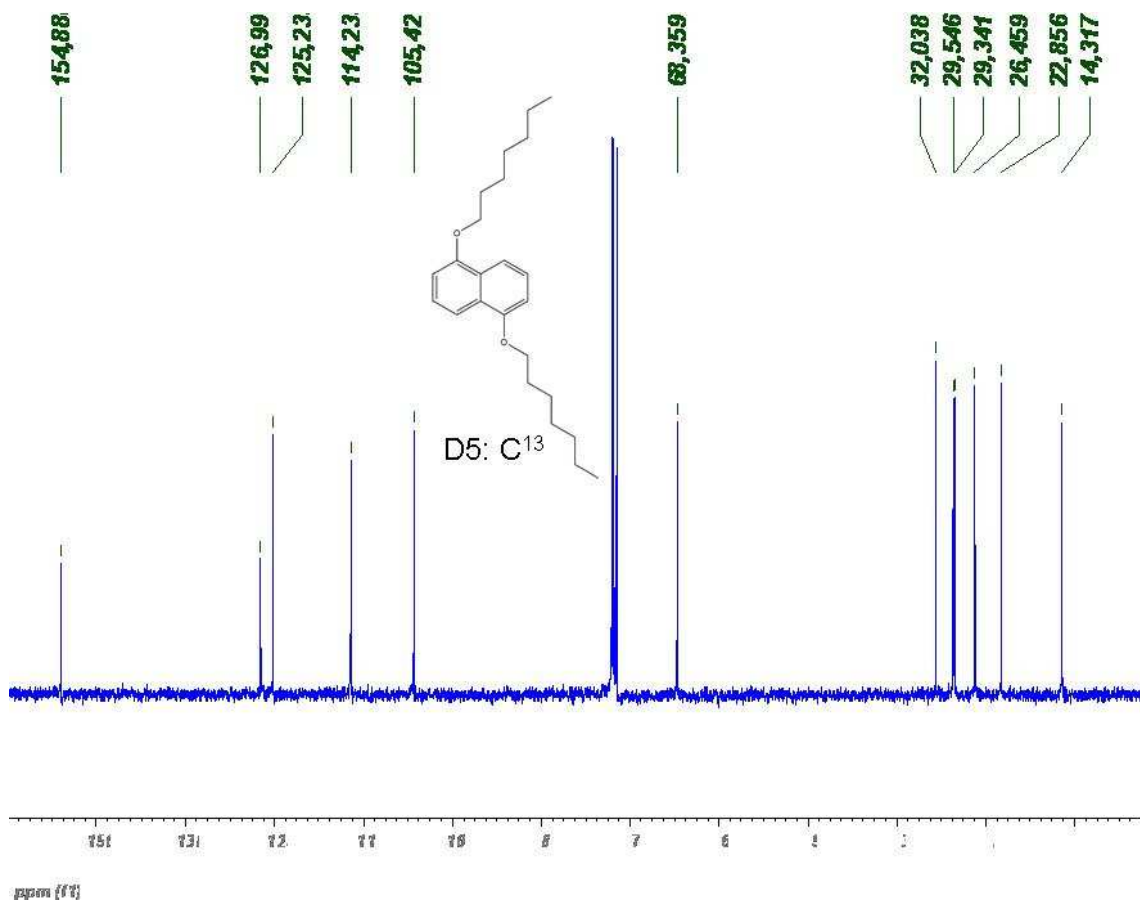

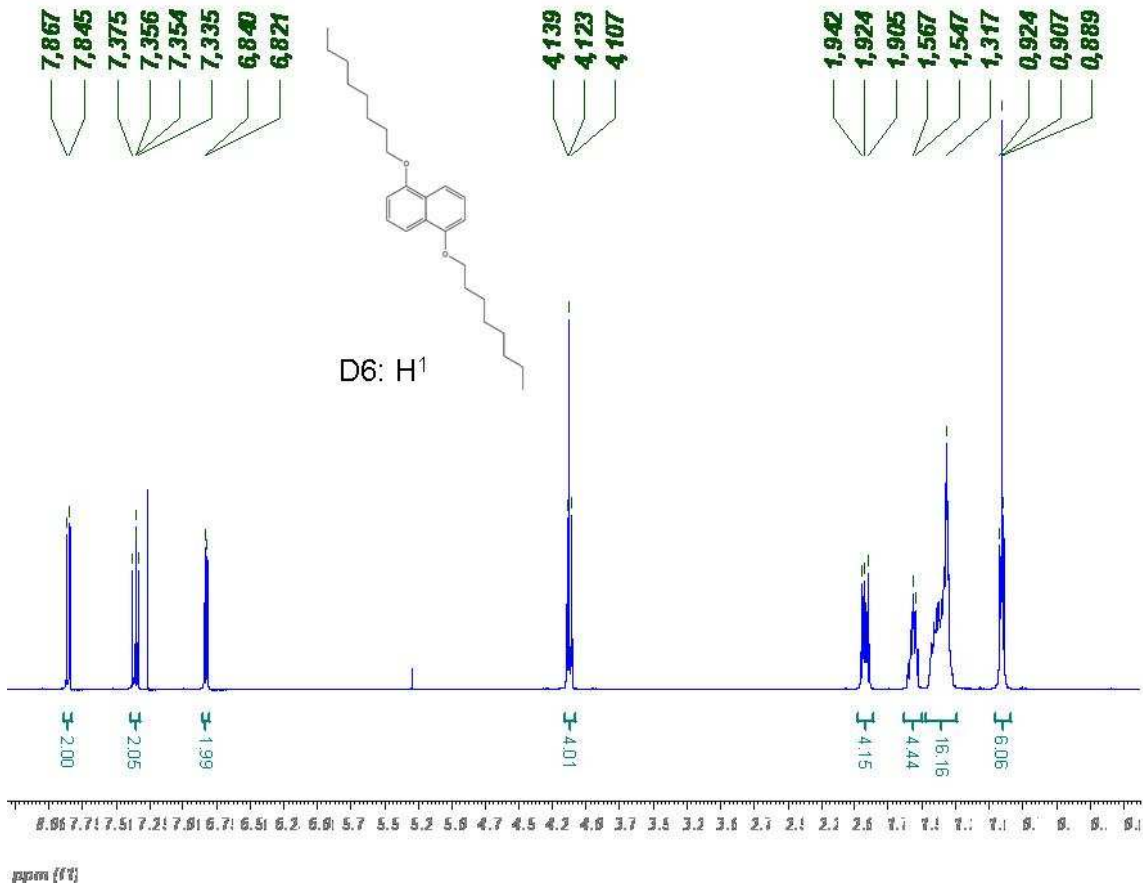

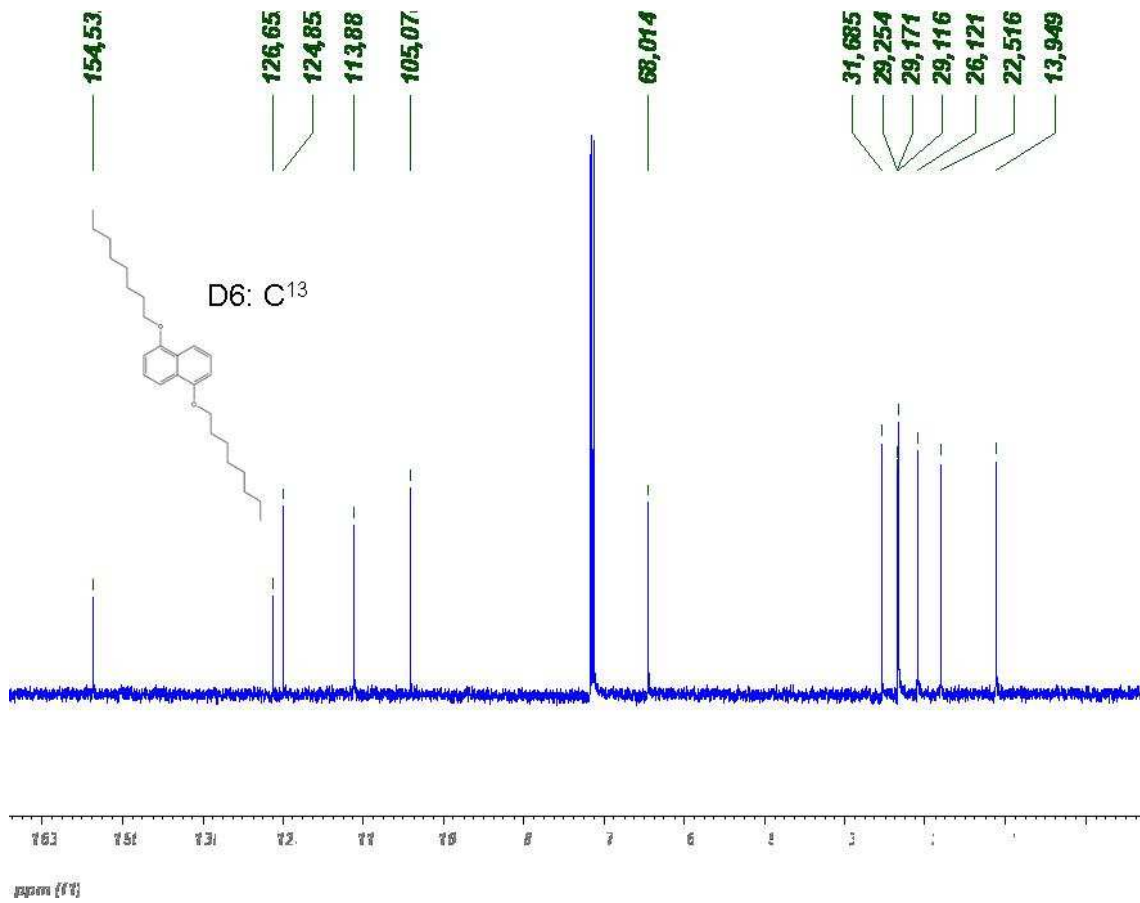

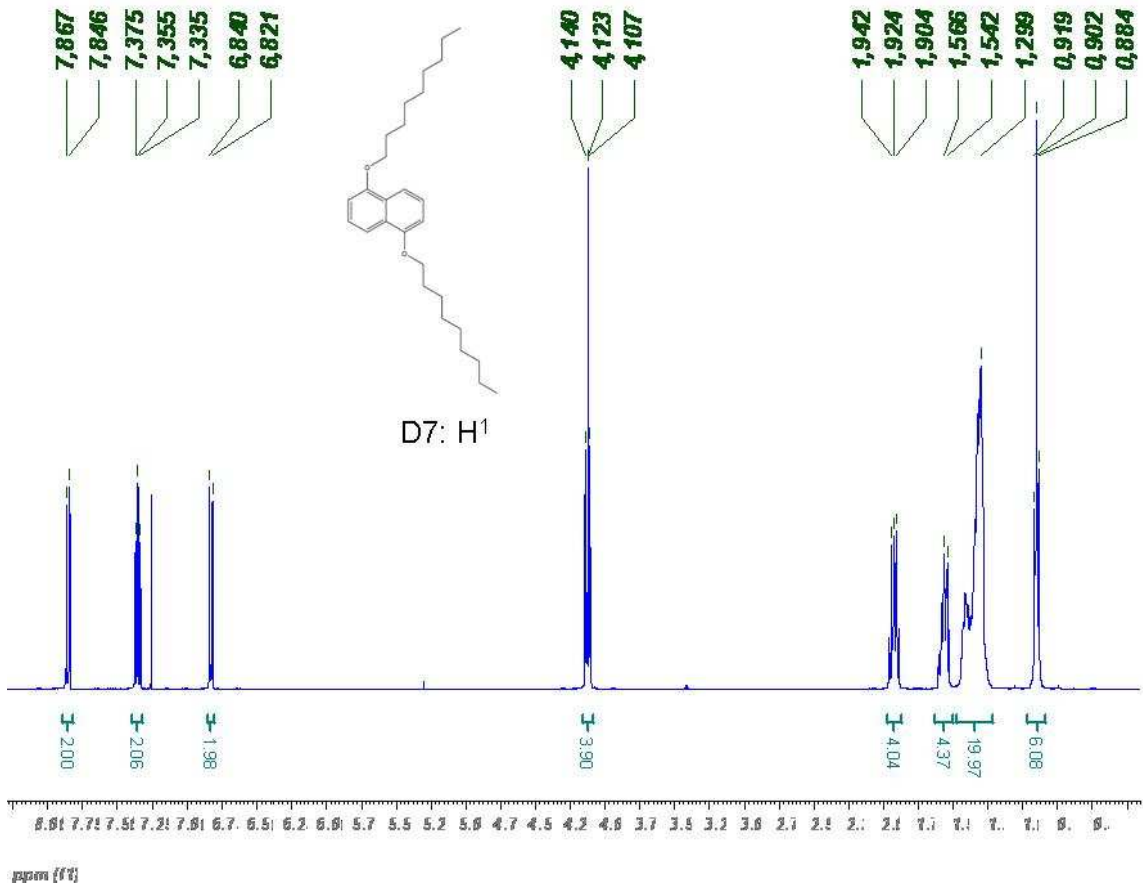

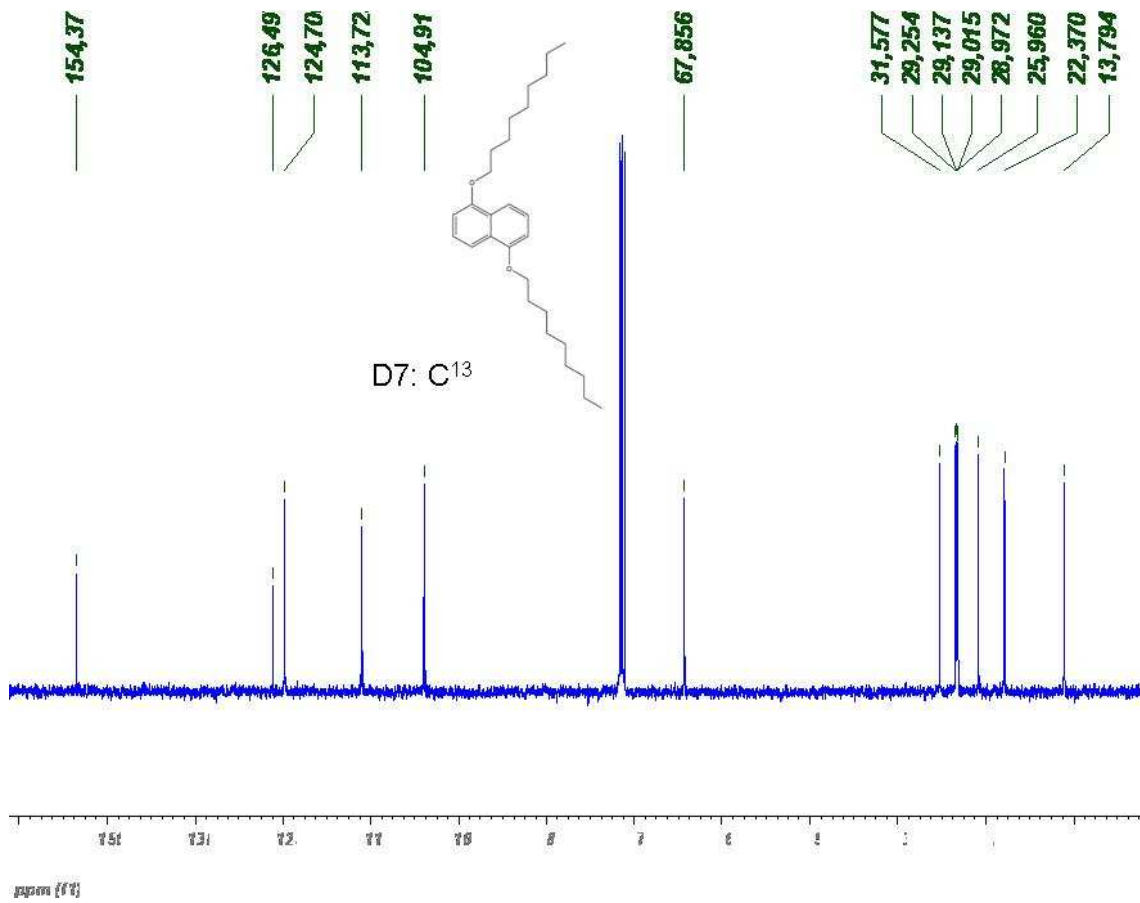



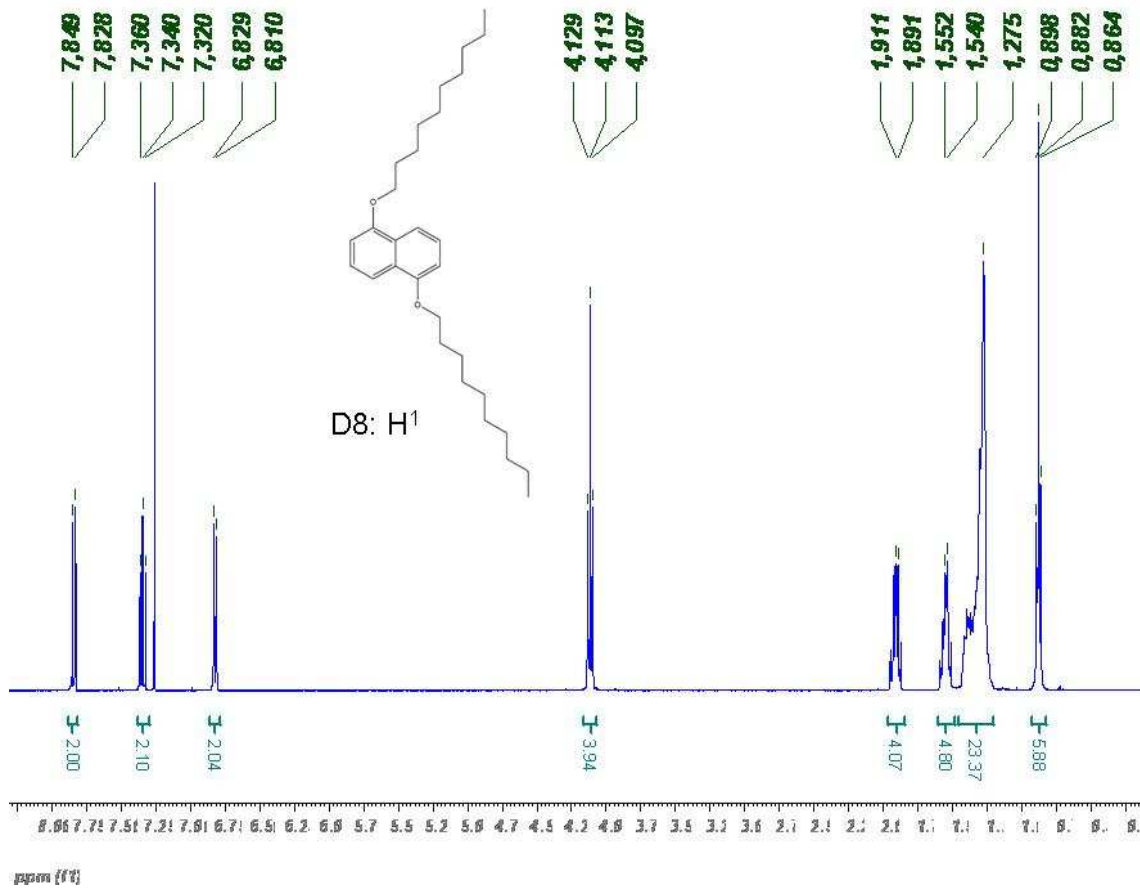

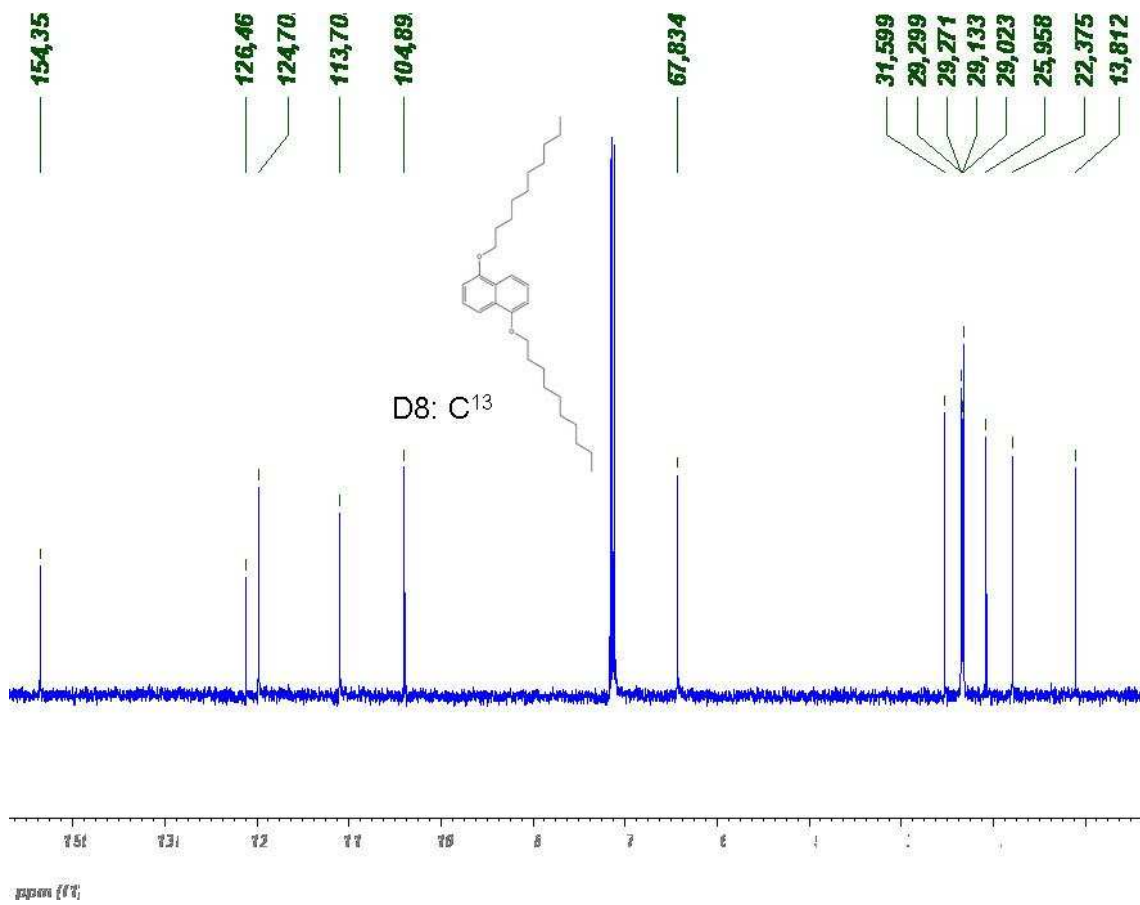

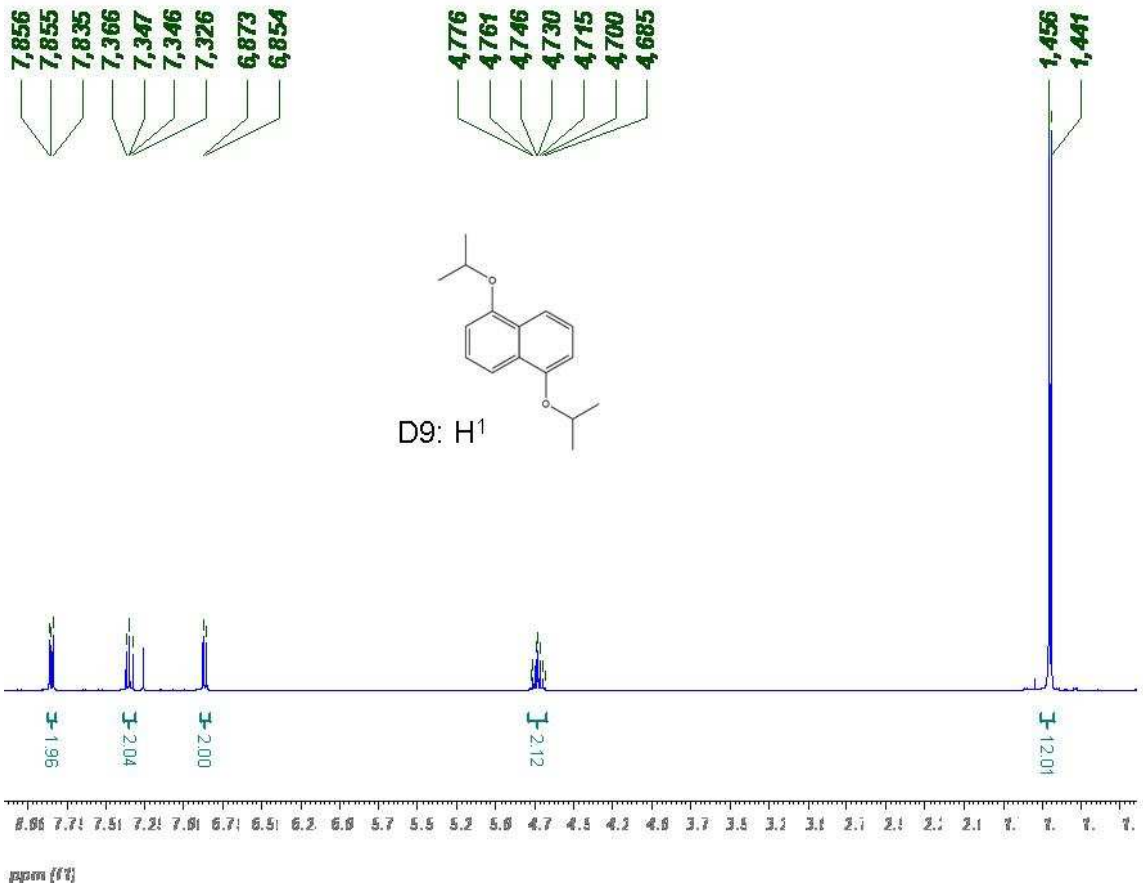

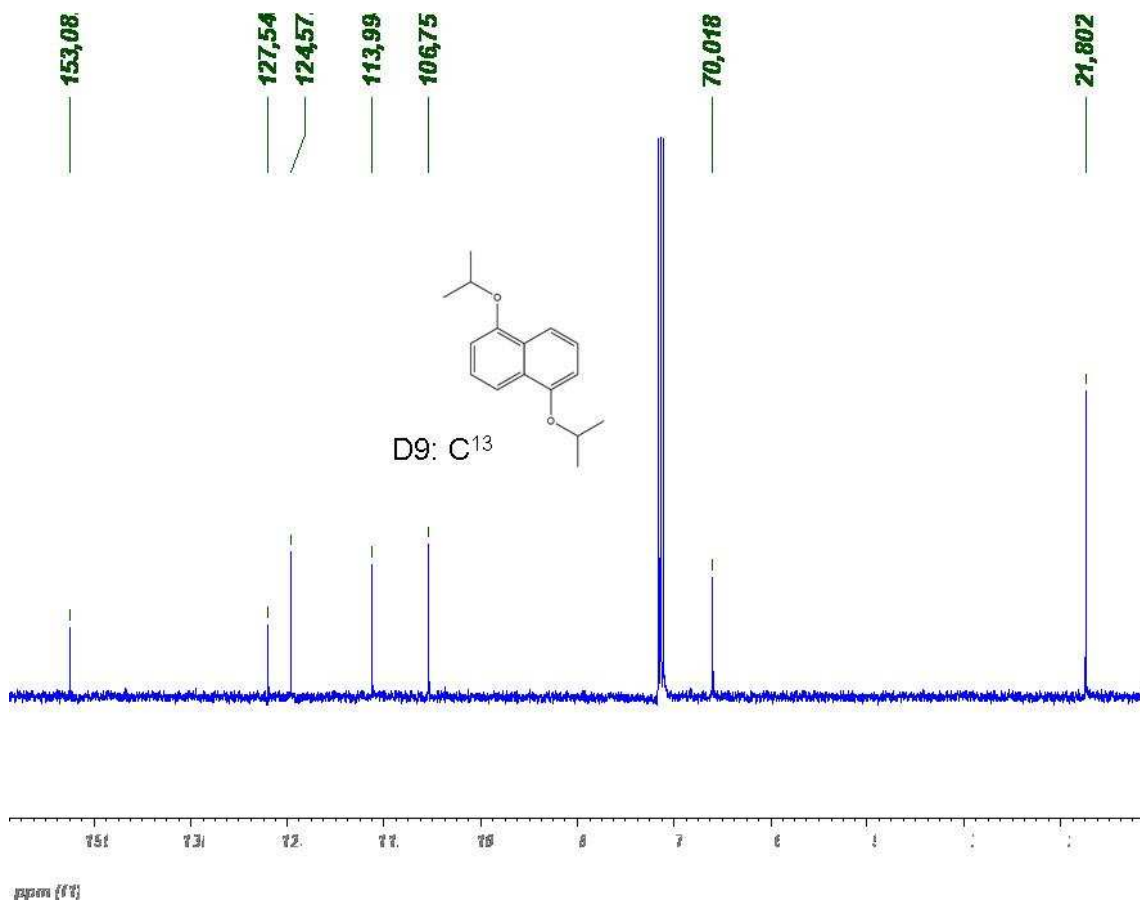

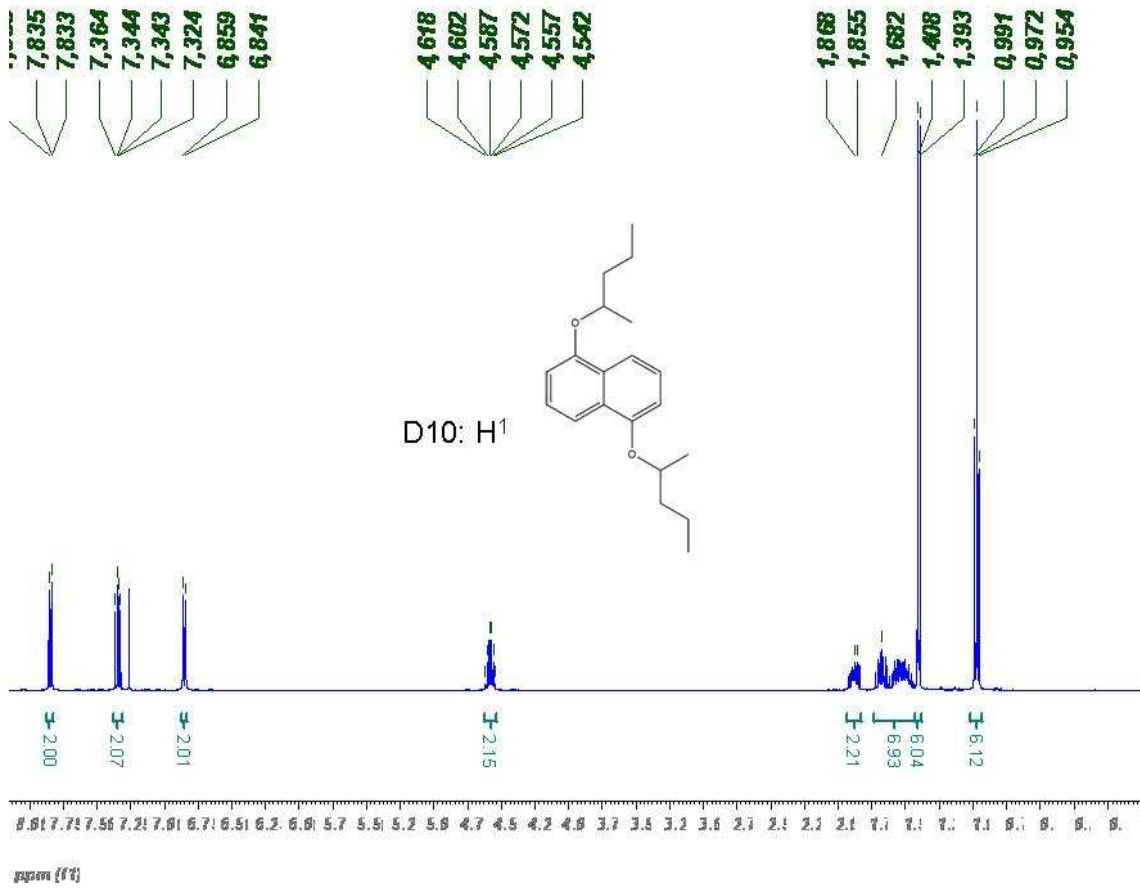

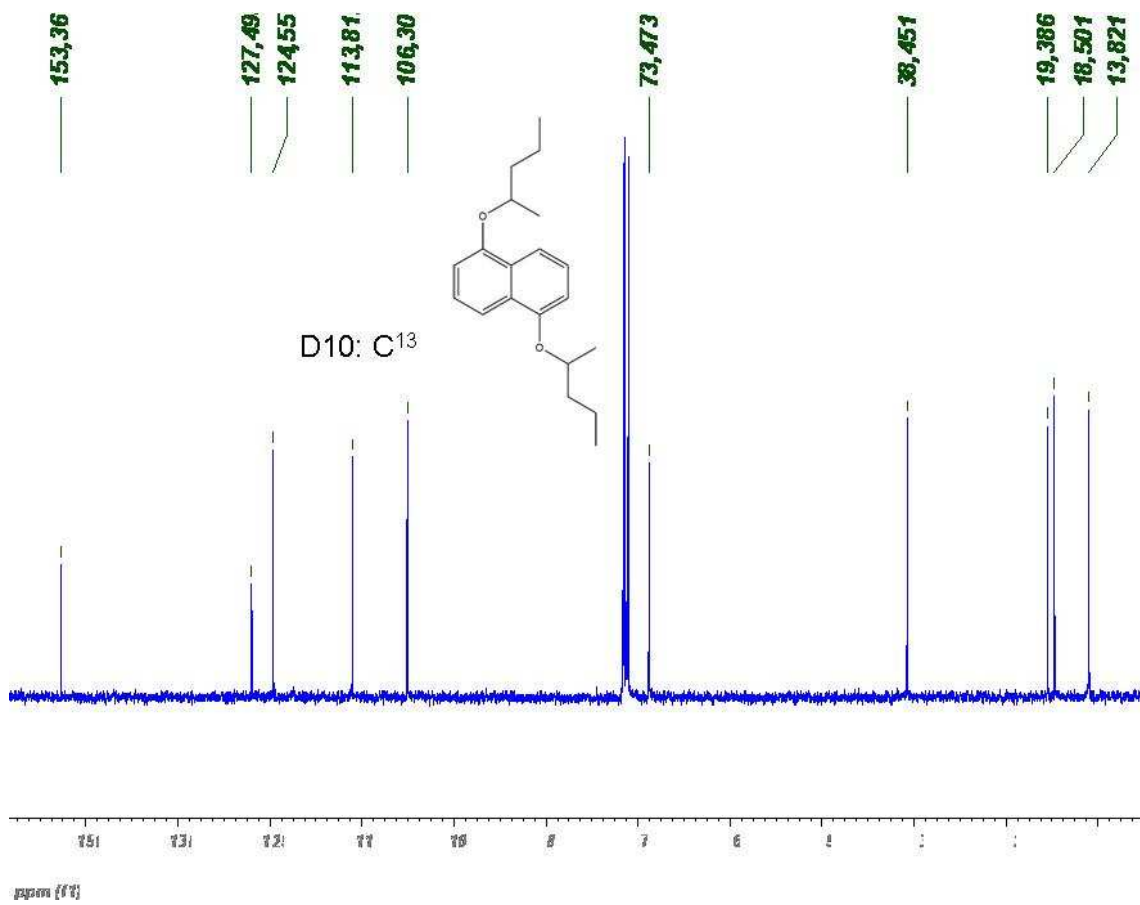

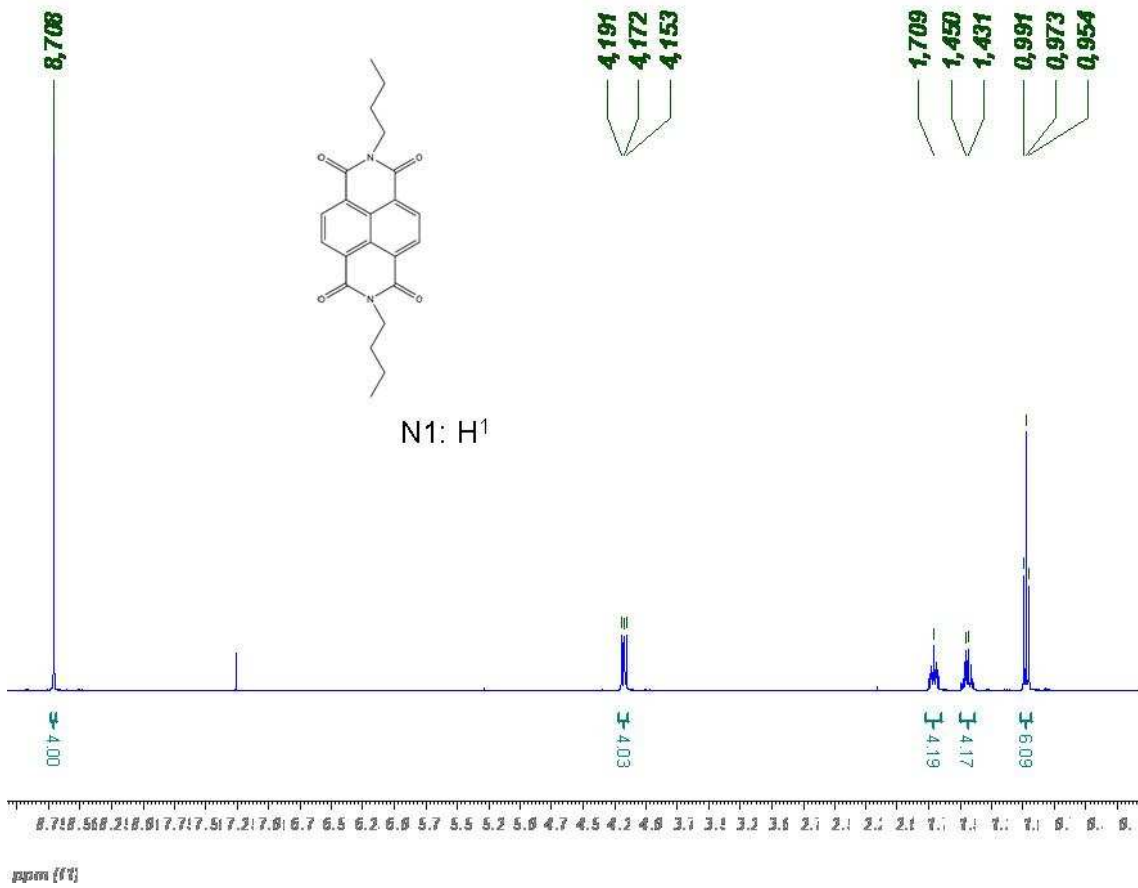

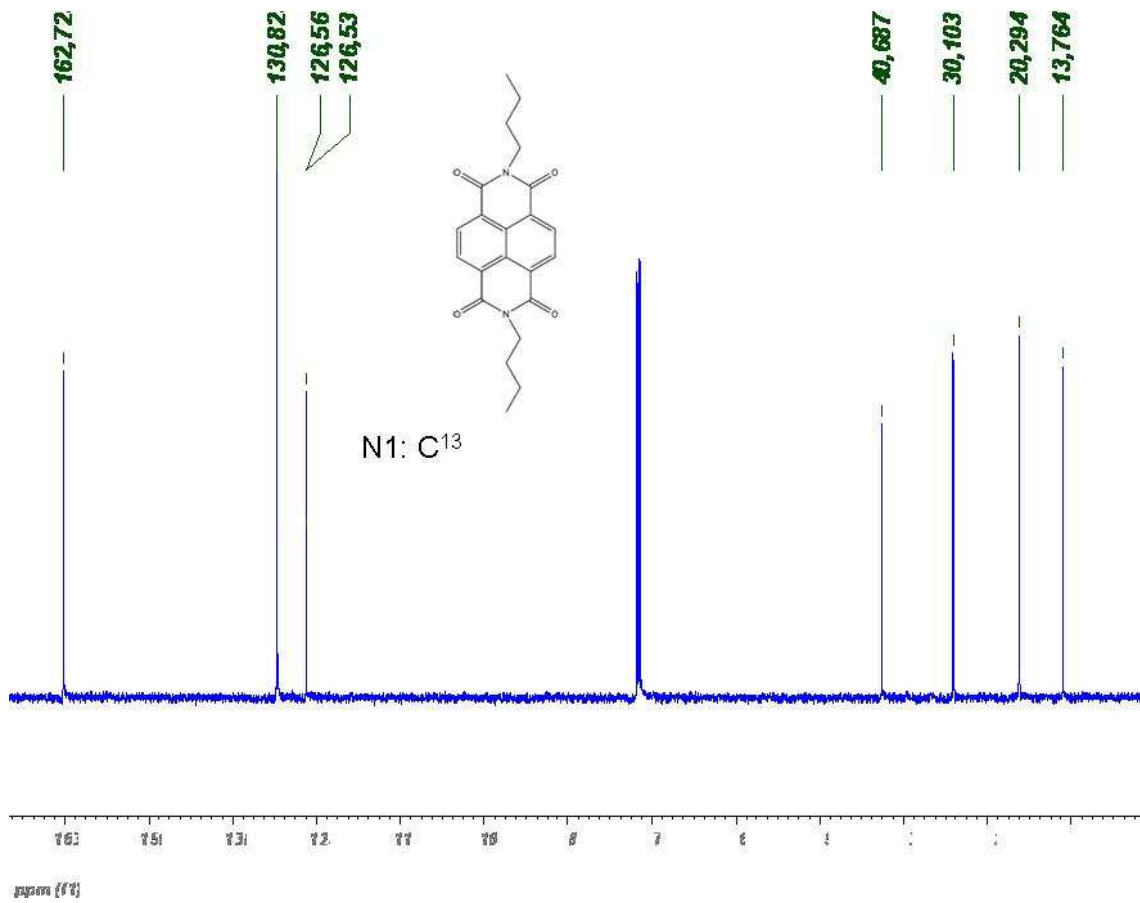



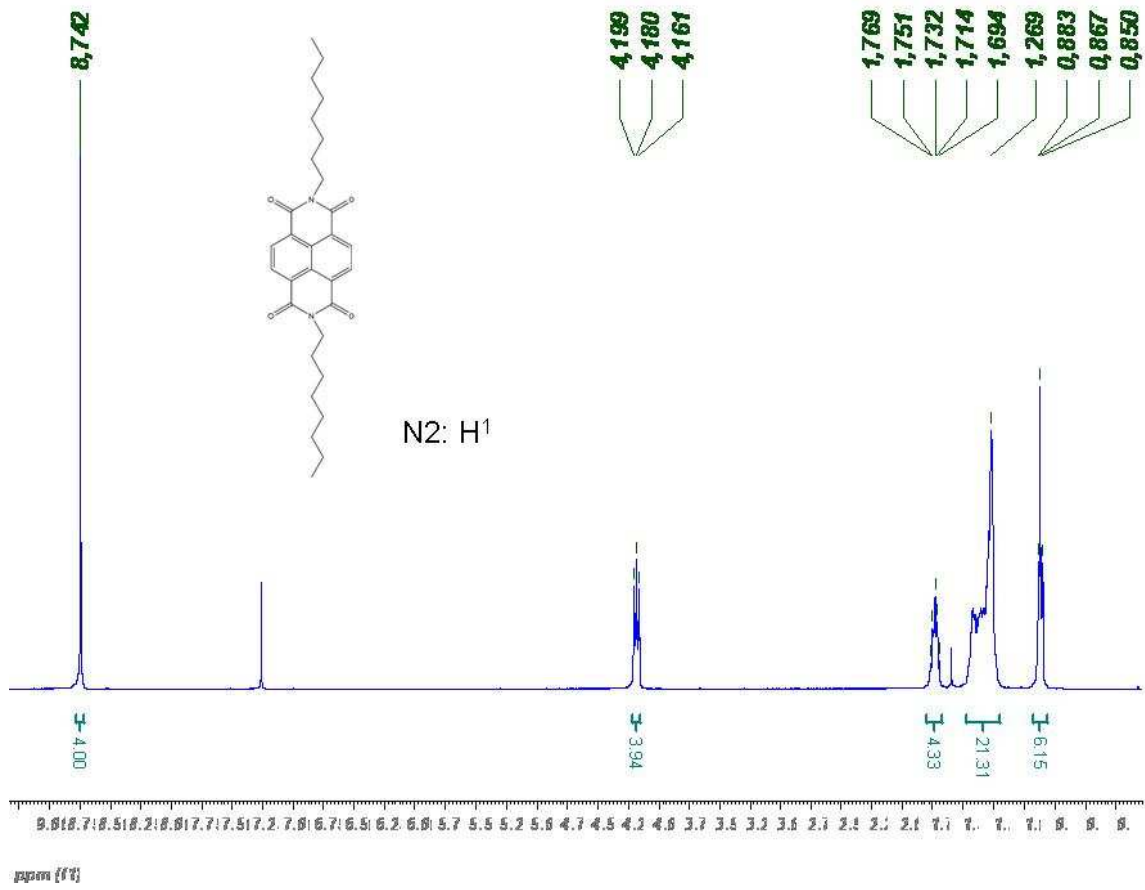

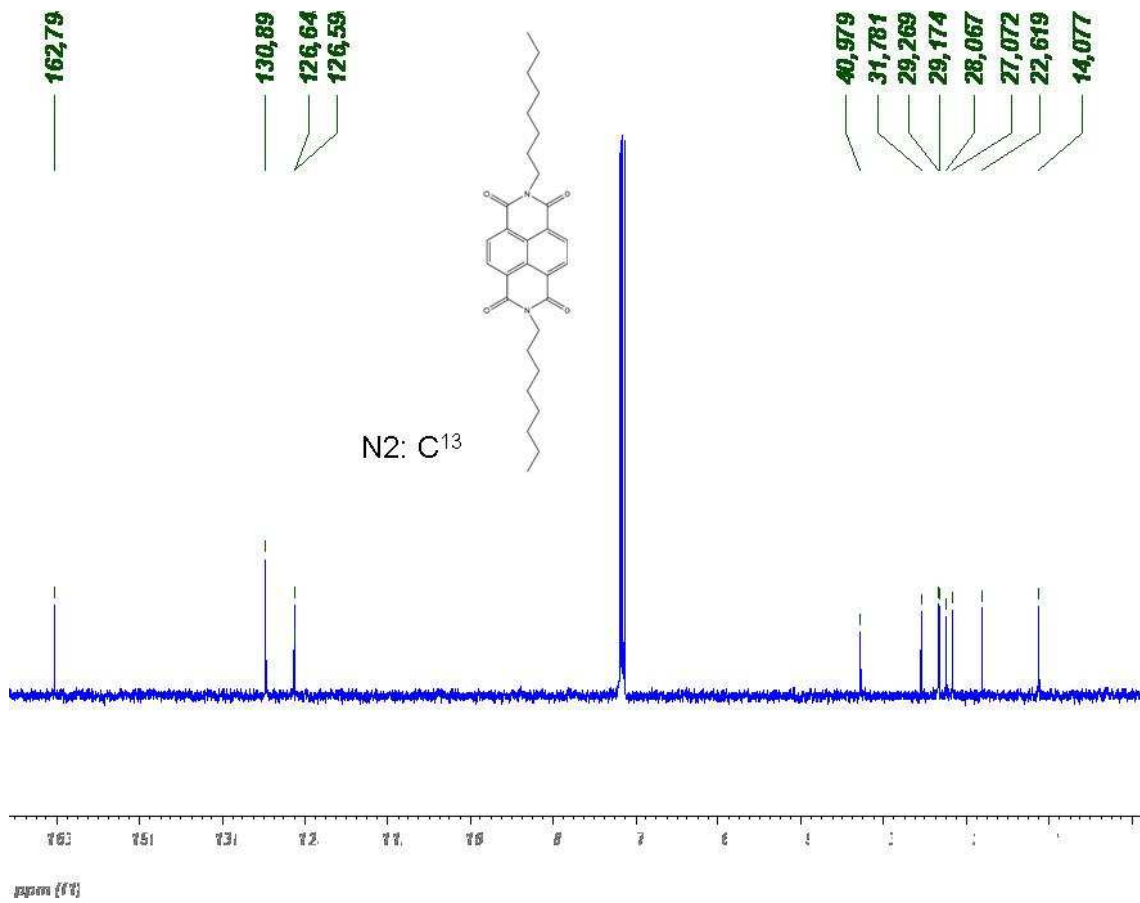

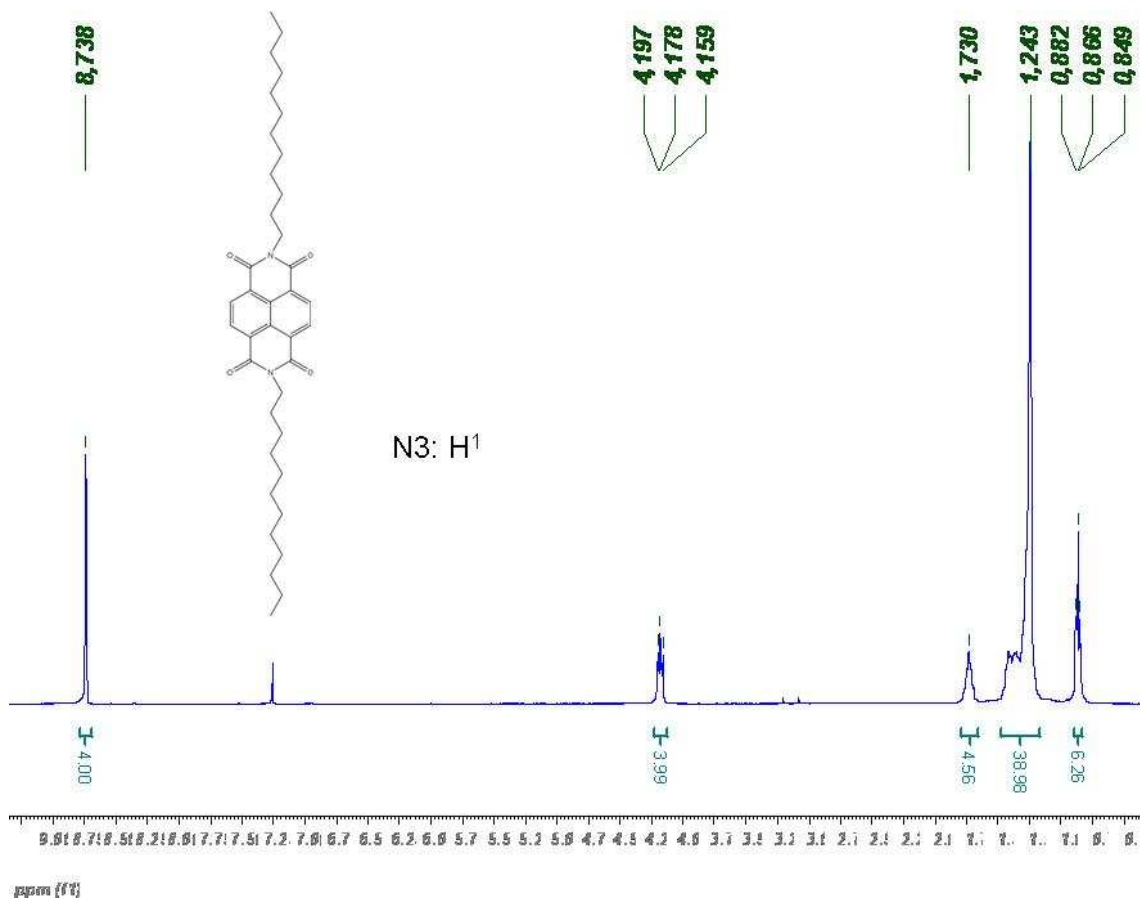

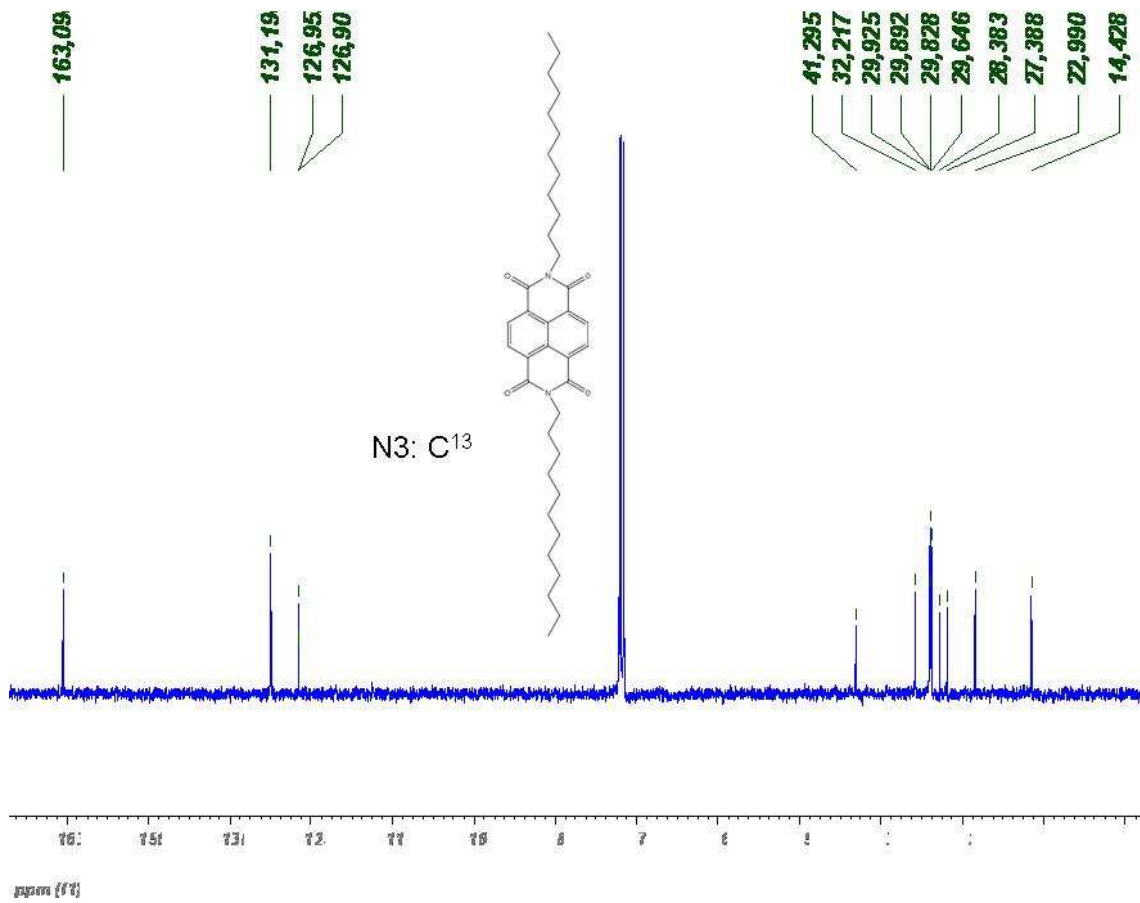

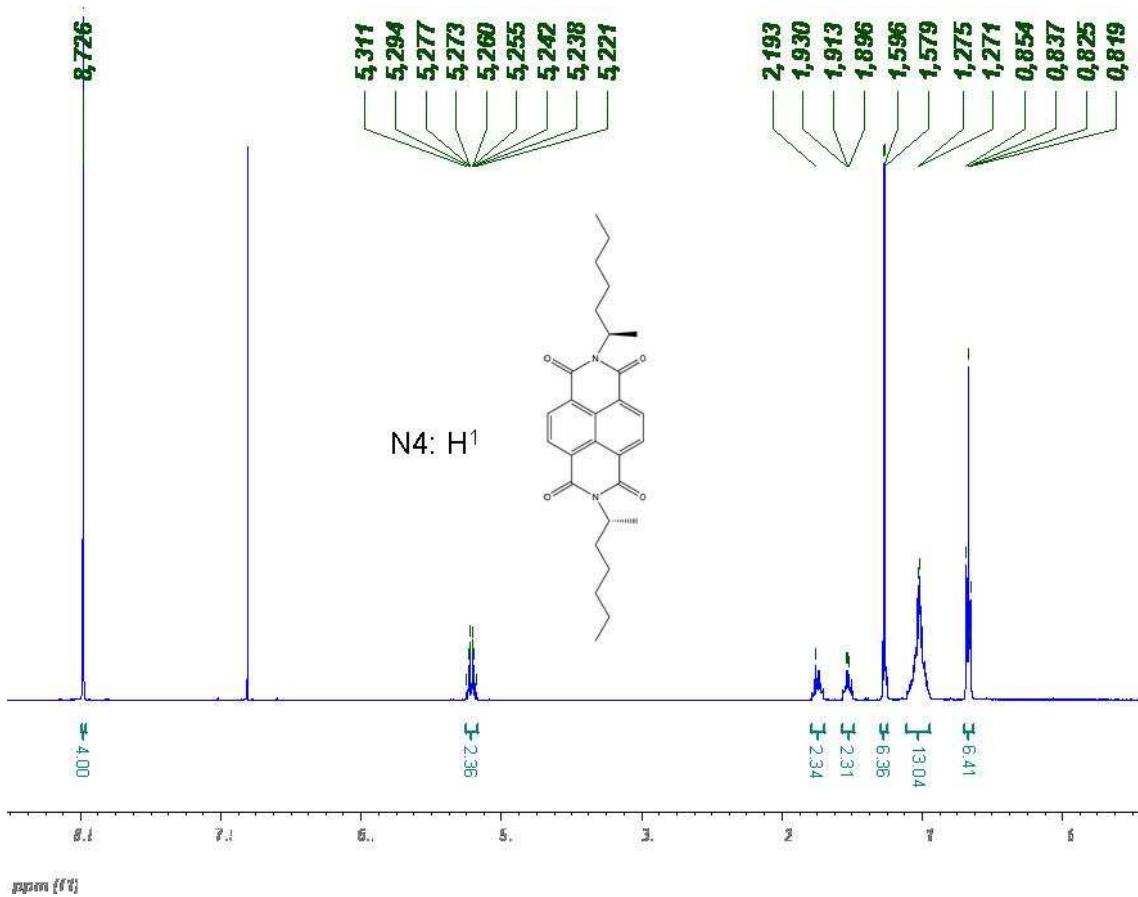

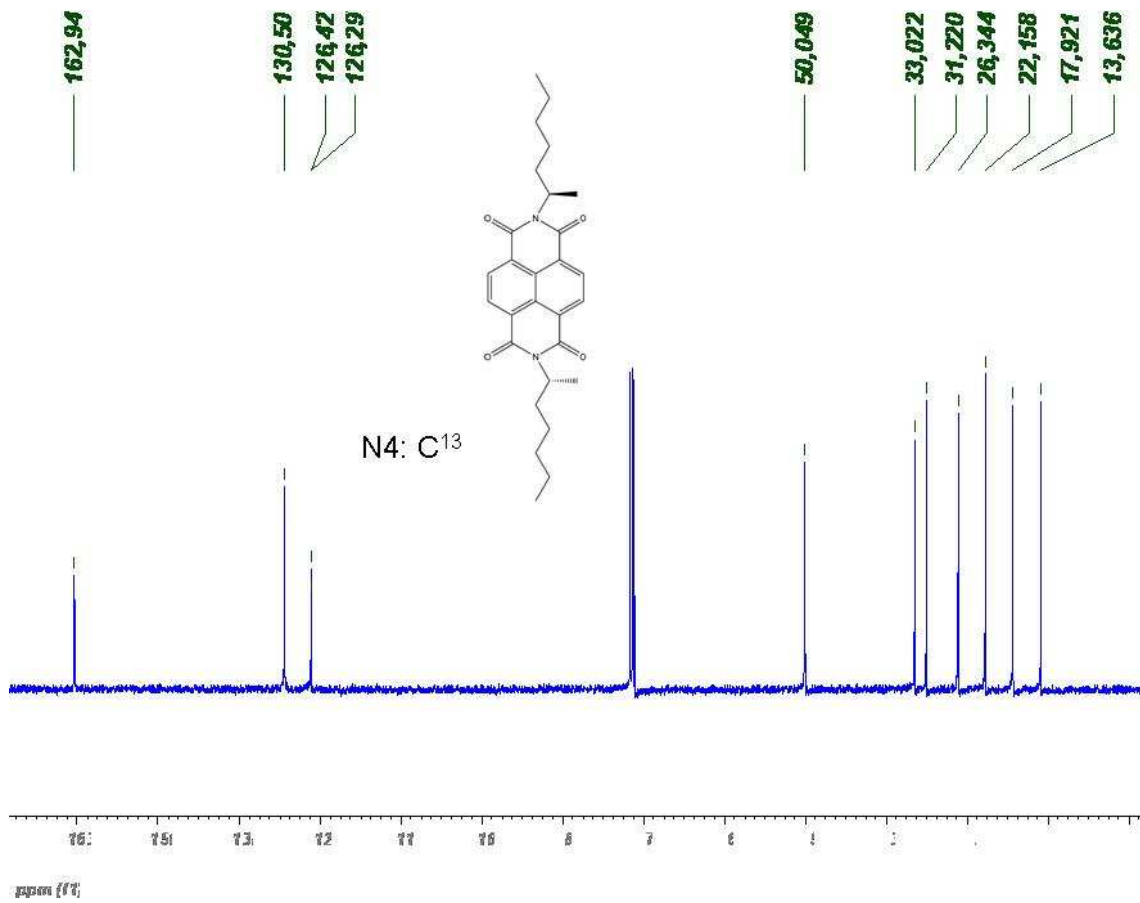

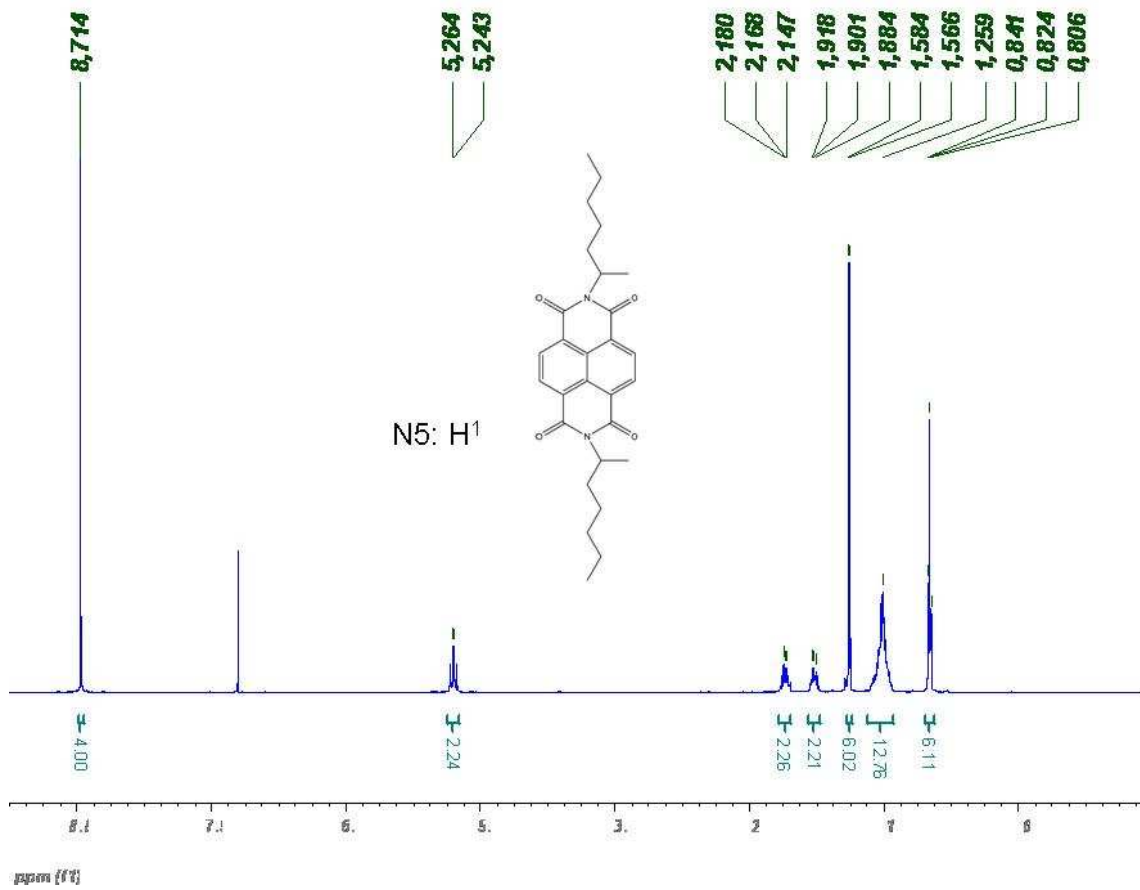

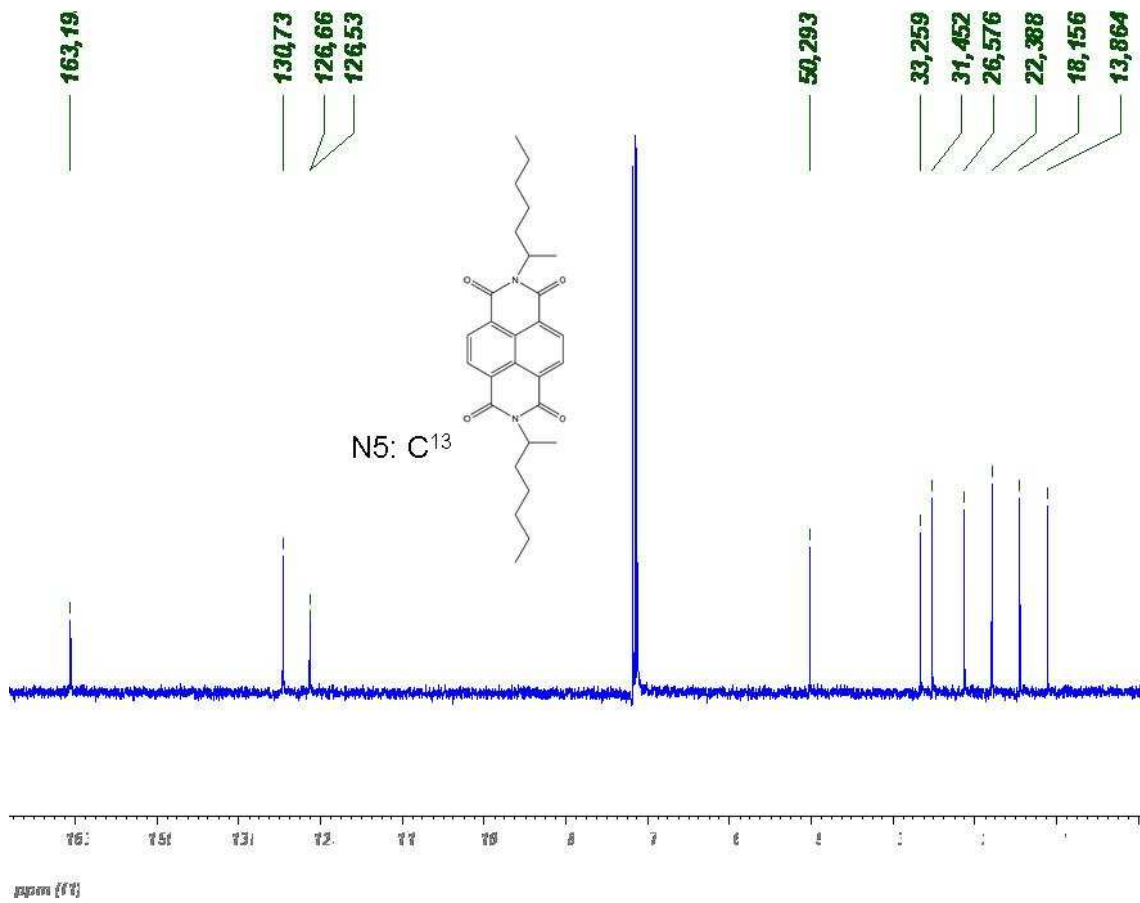



**UV-Vis Spectra.** Y-axis is absorbance and X-axis is wavelength (nm). 1:1 molar Dan:Ndi mixtures were placed between two glass slides and heated to the isotropic state. Spectra were collected at least 5 min after reaching the mixture crystallization temperature.

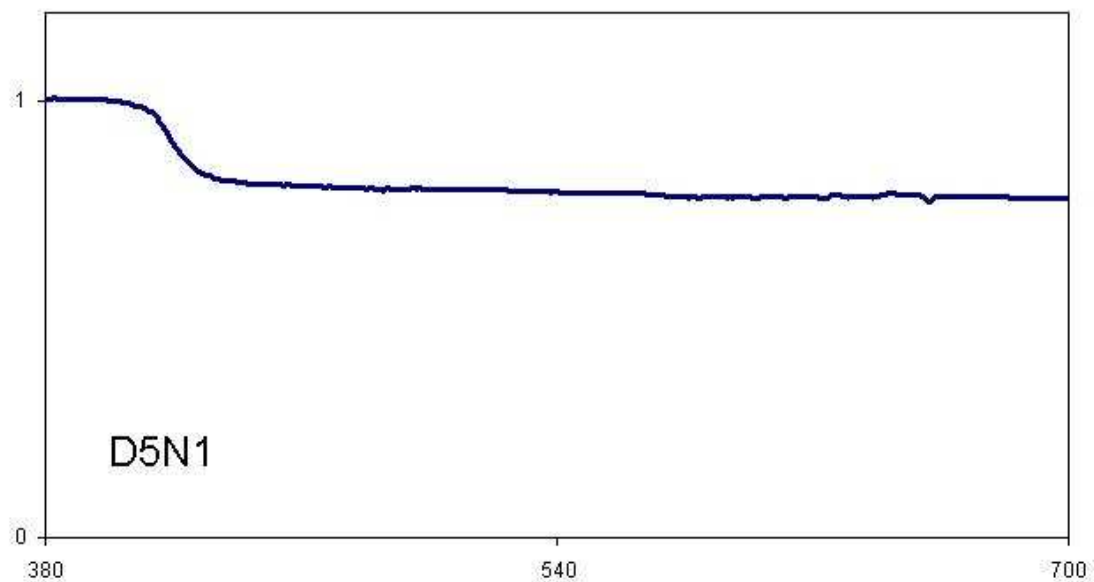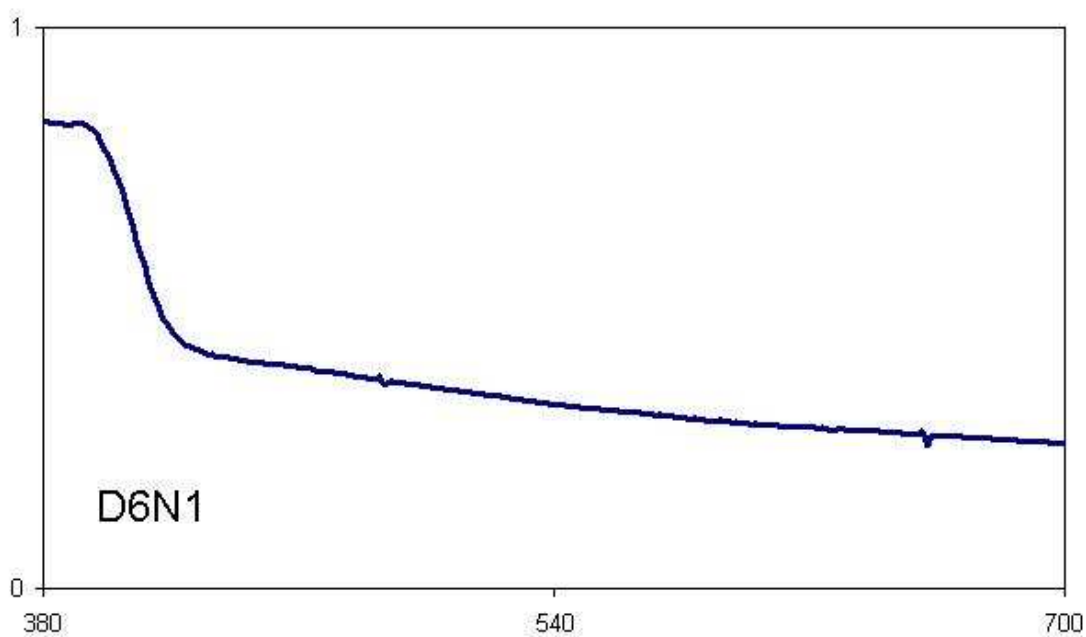

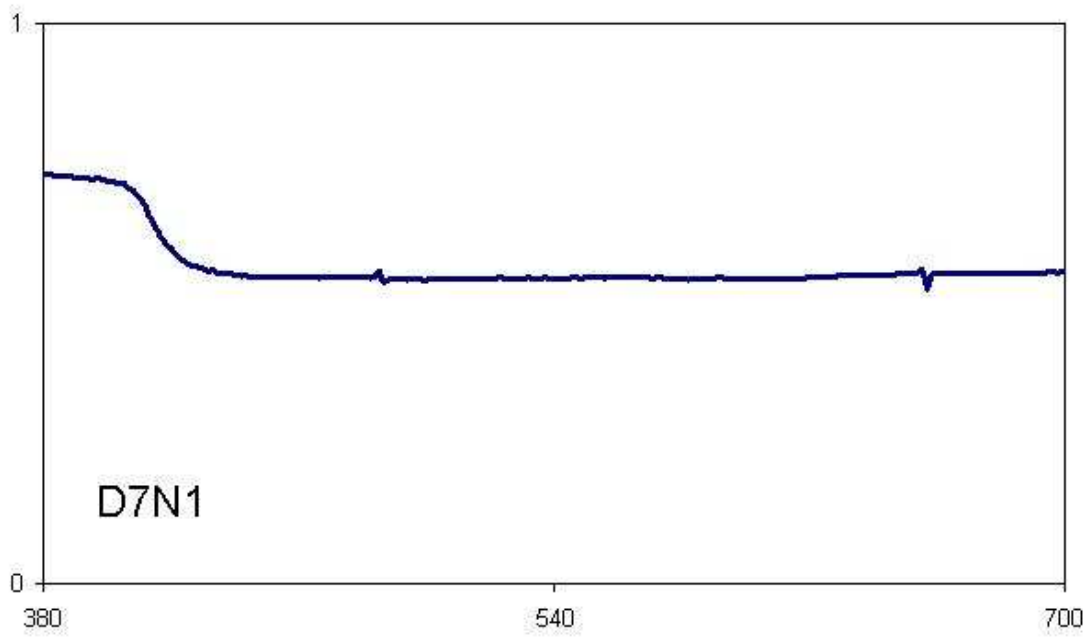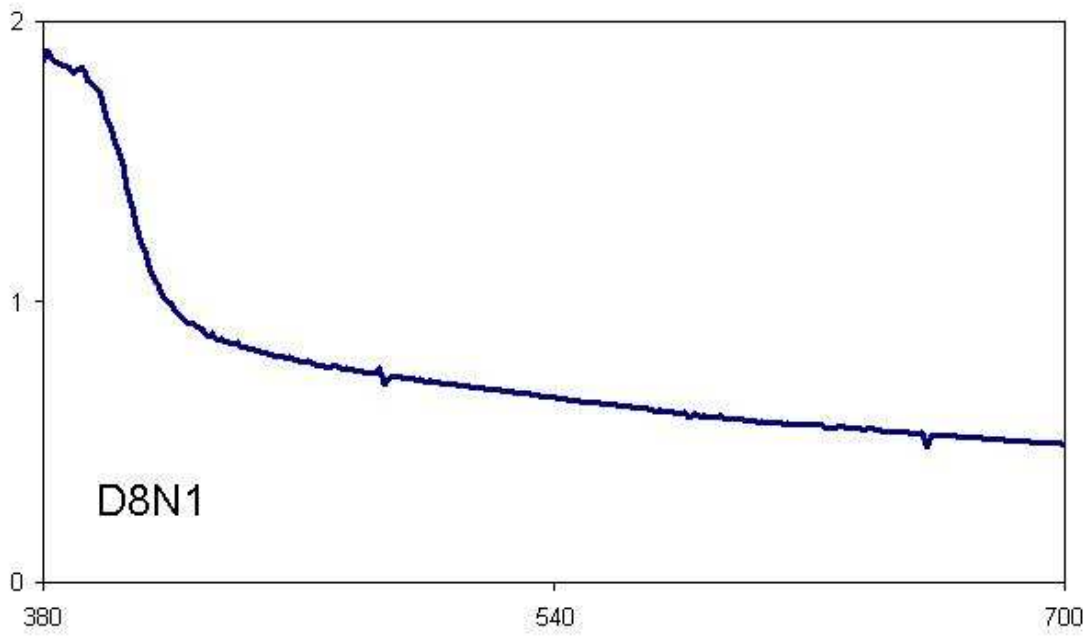

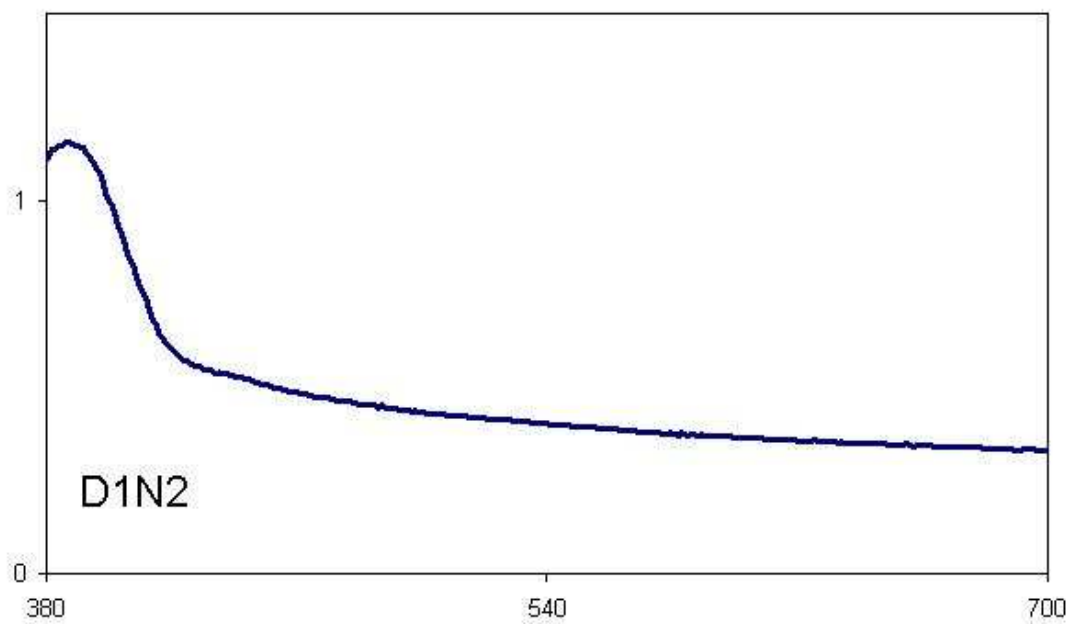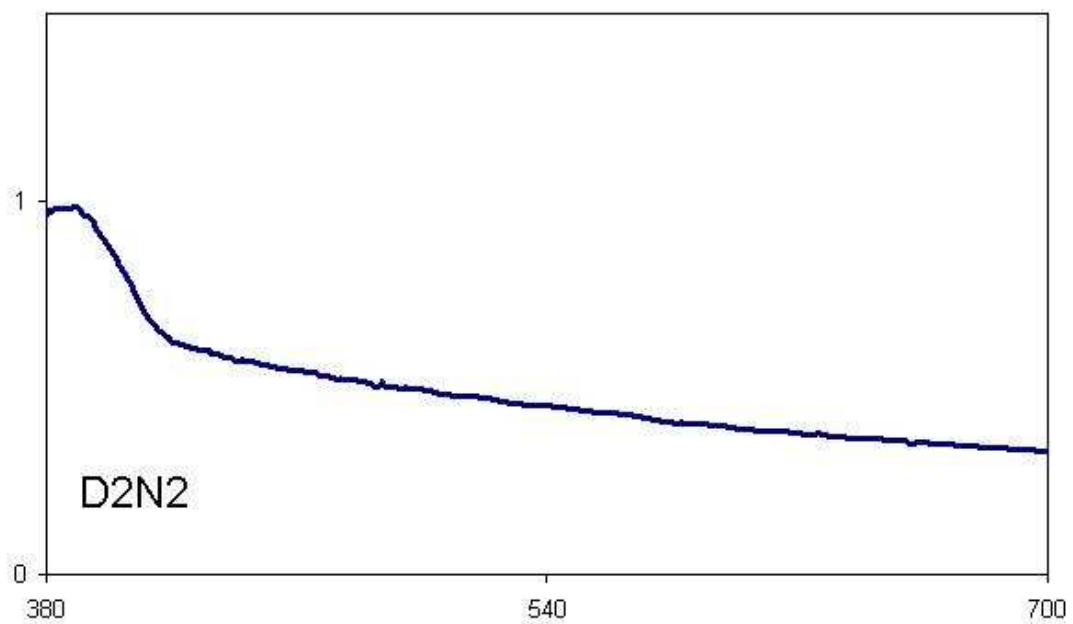

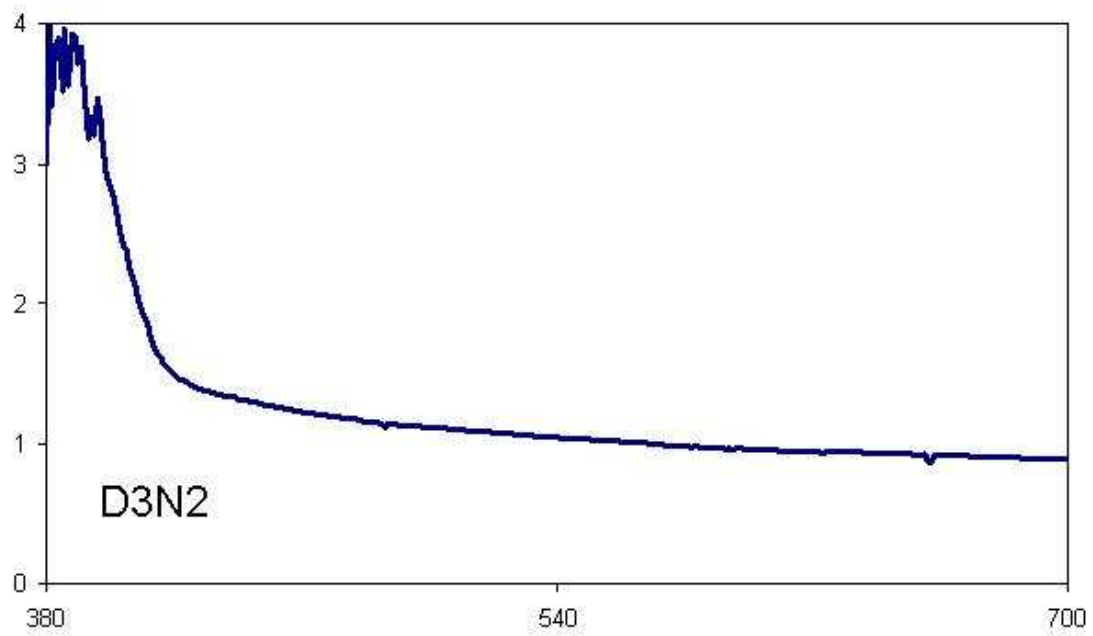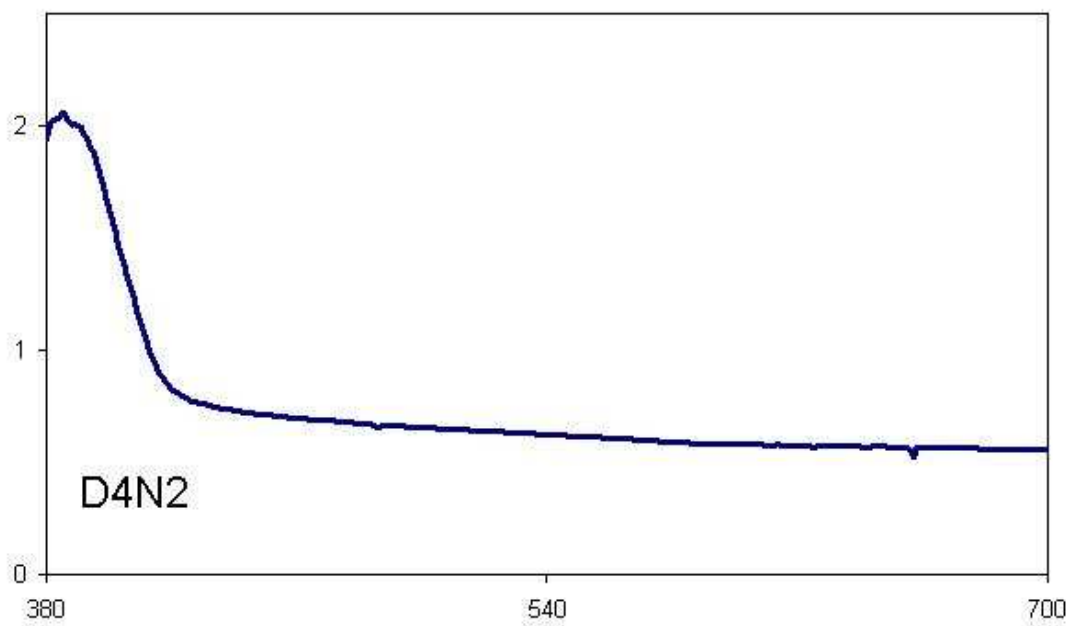

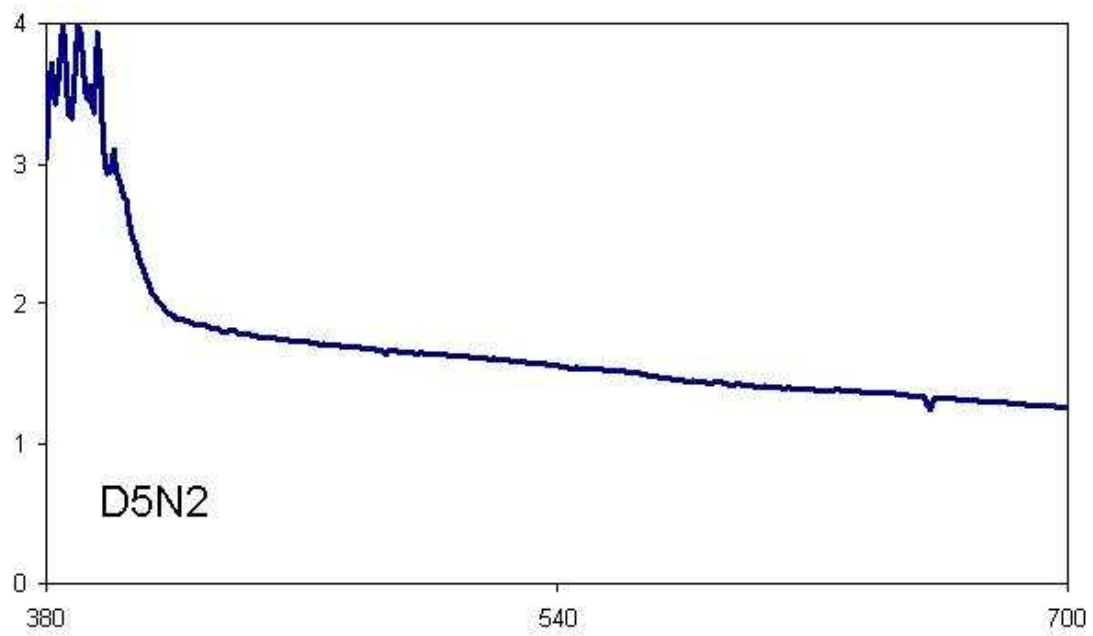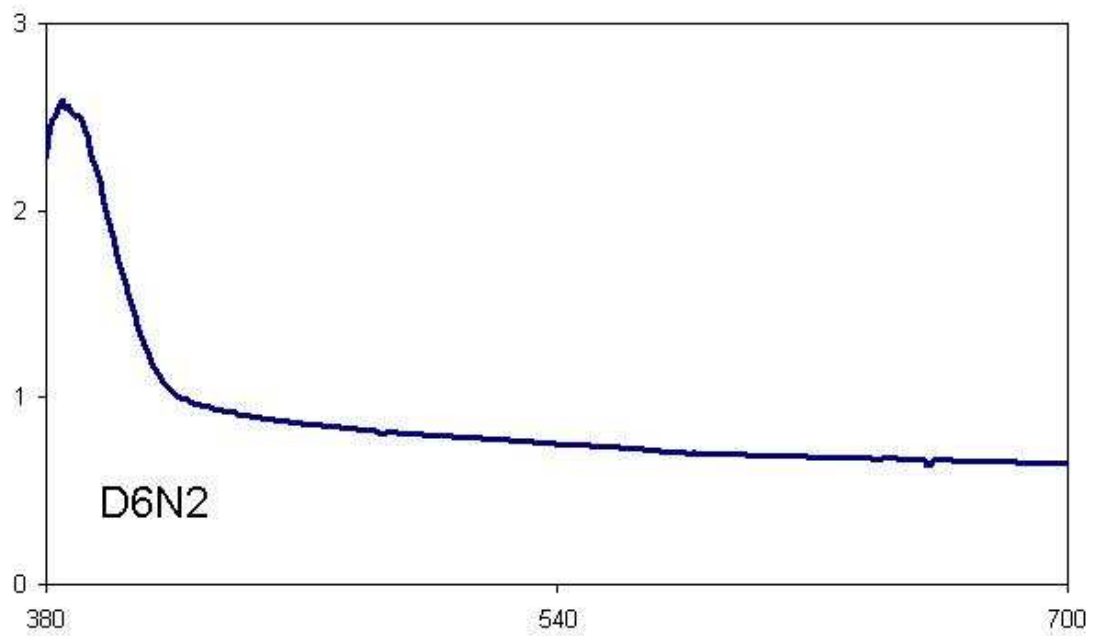

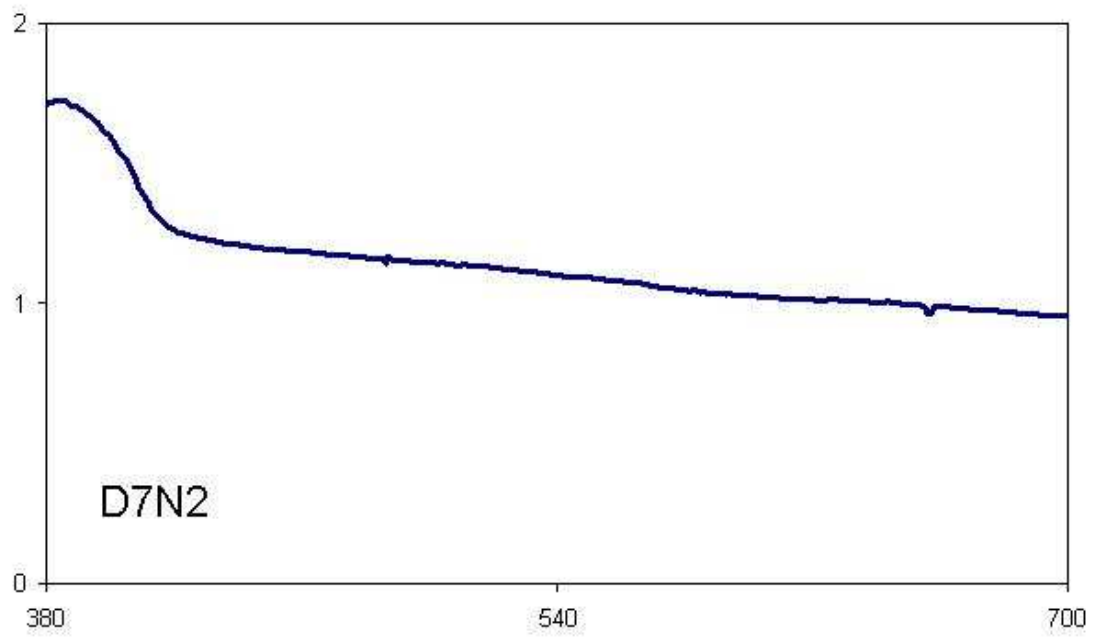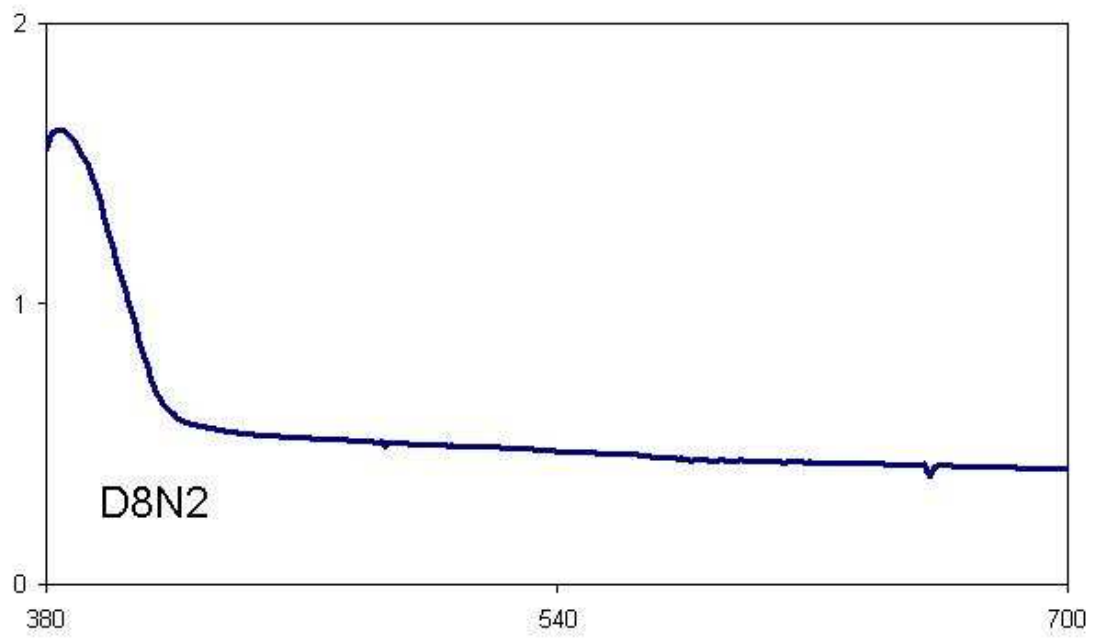

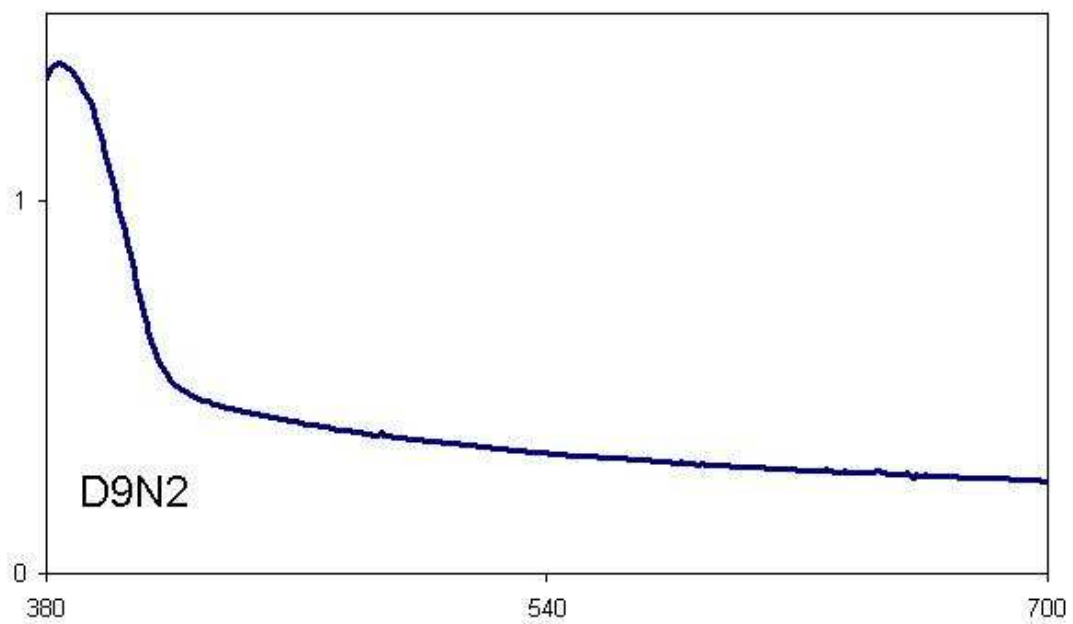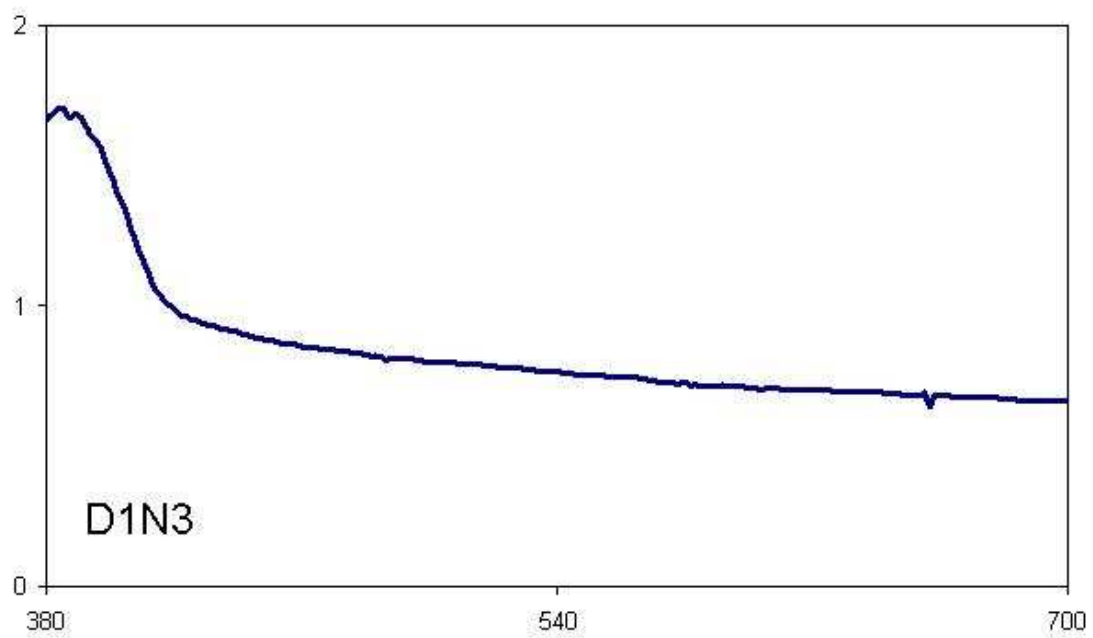

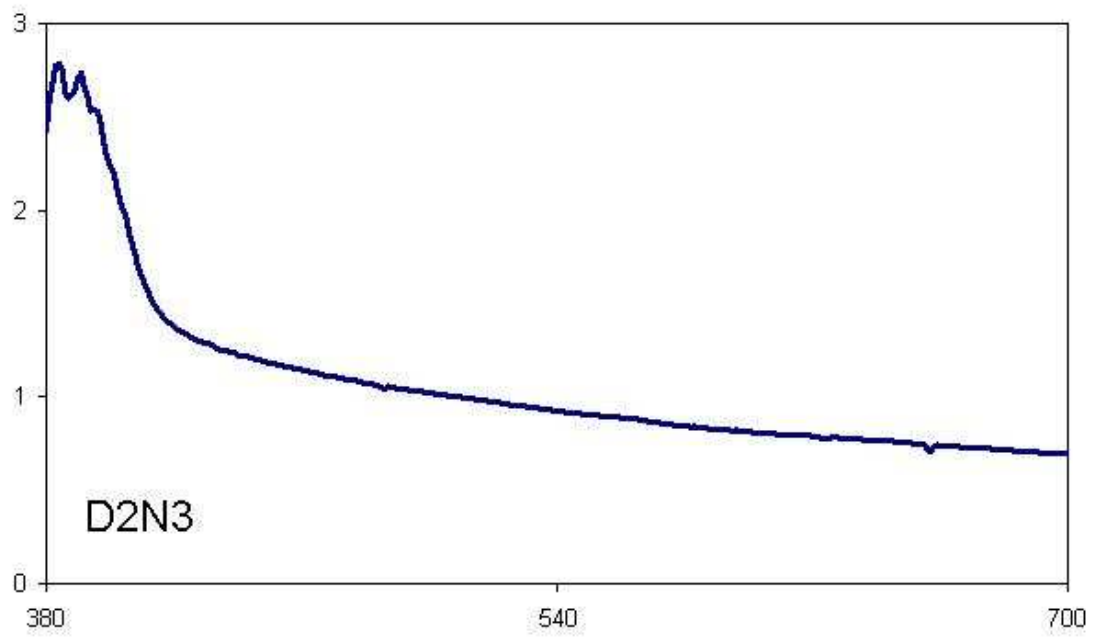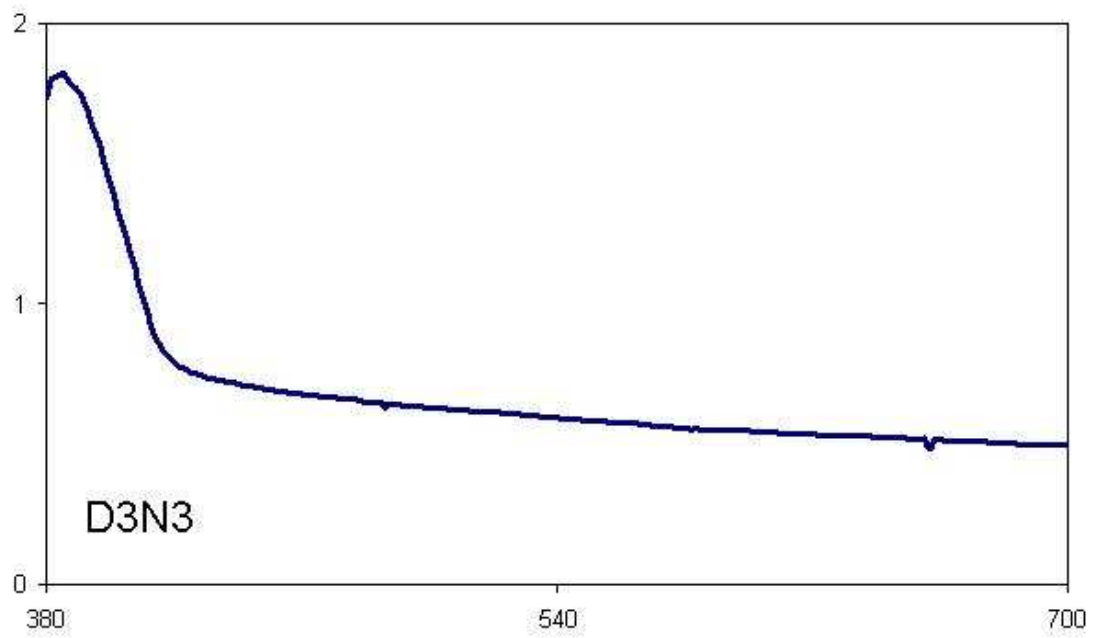



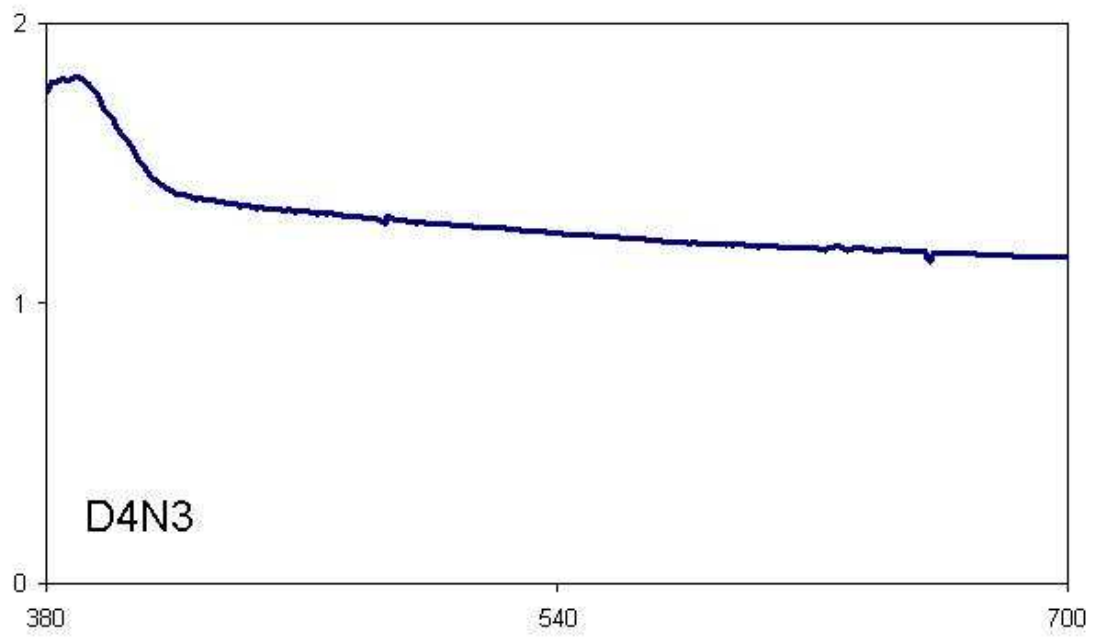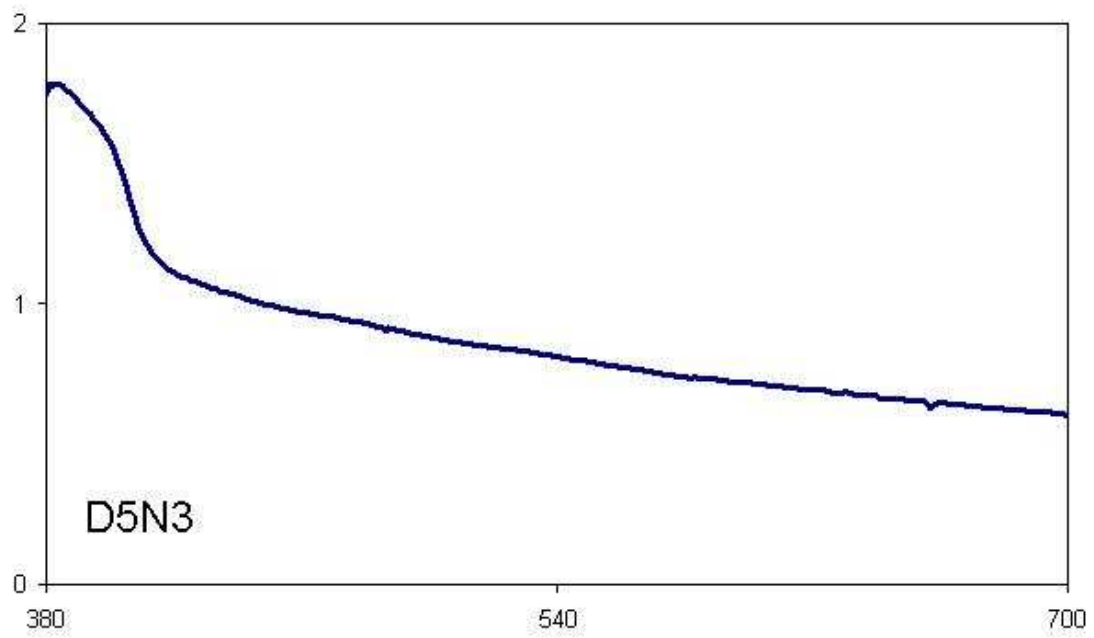

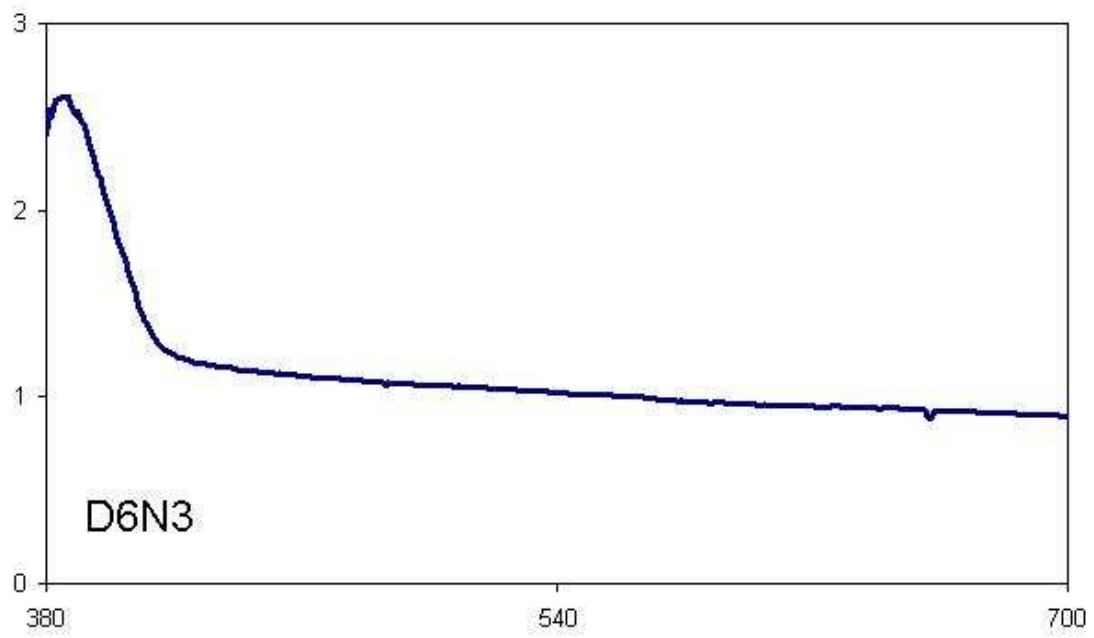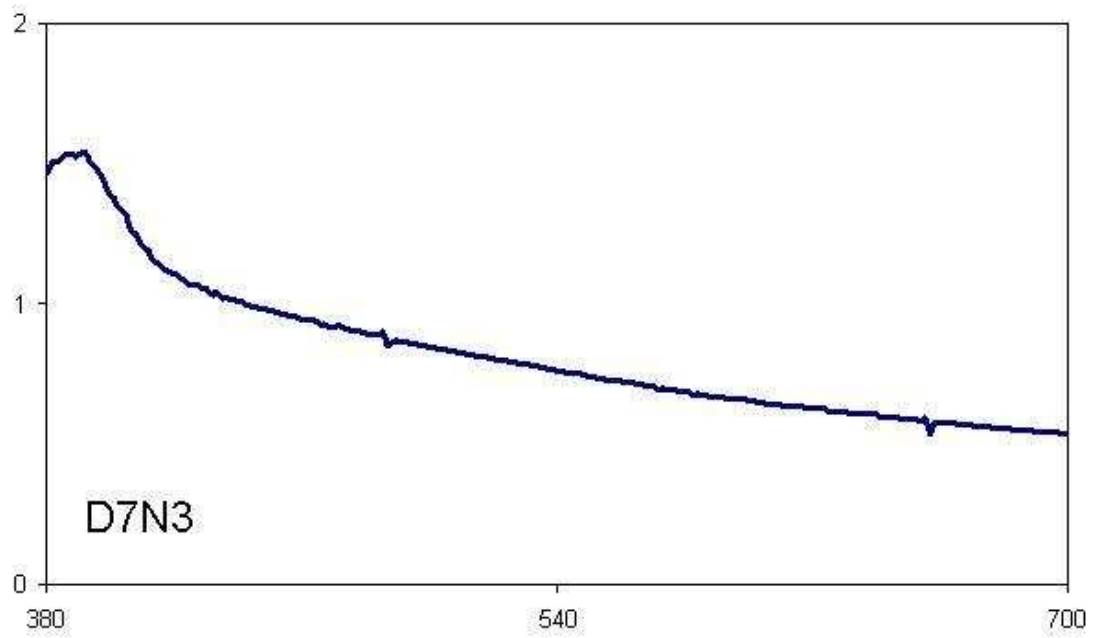

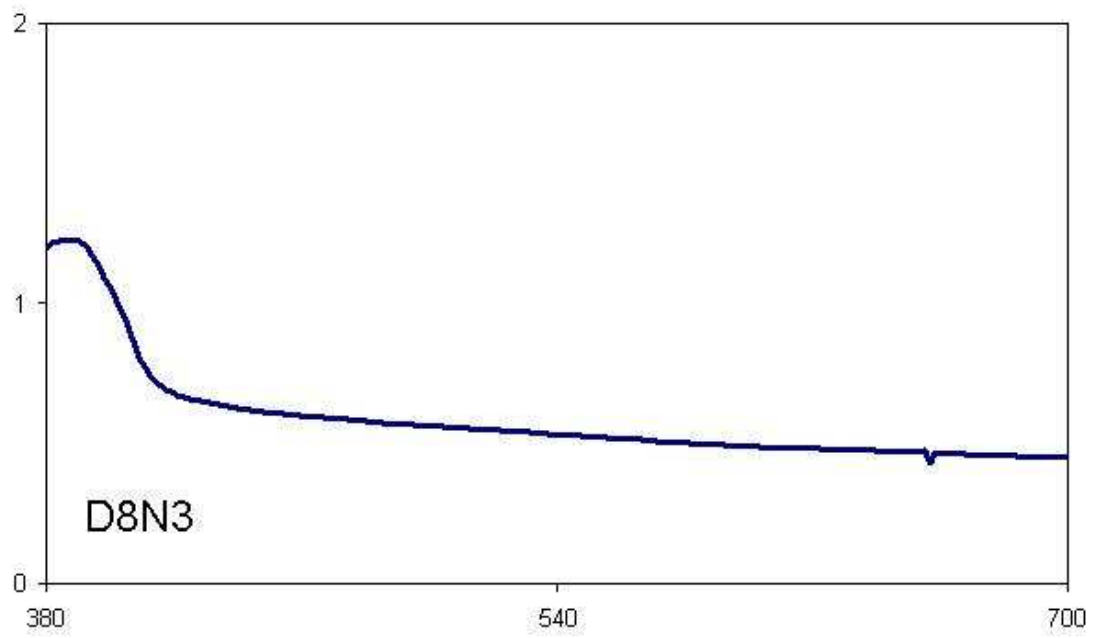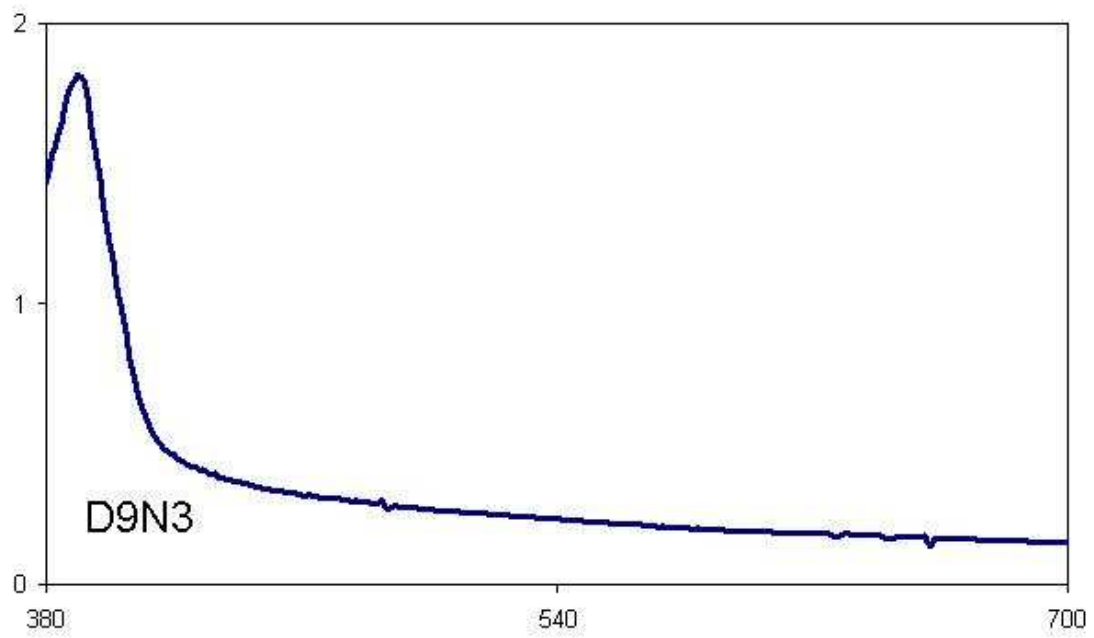

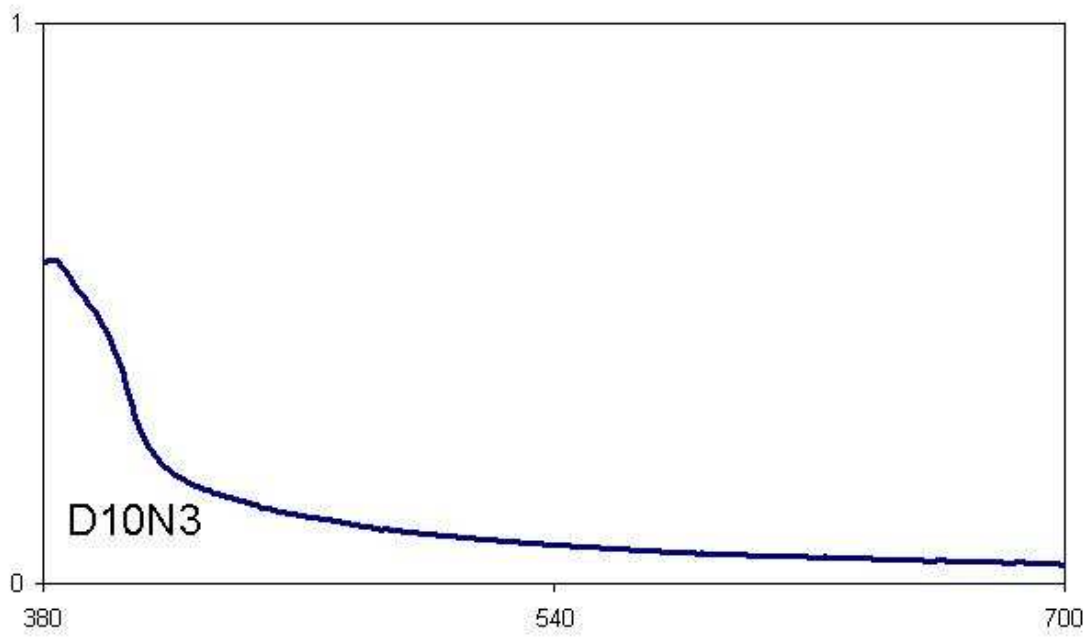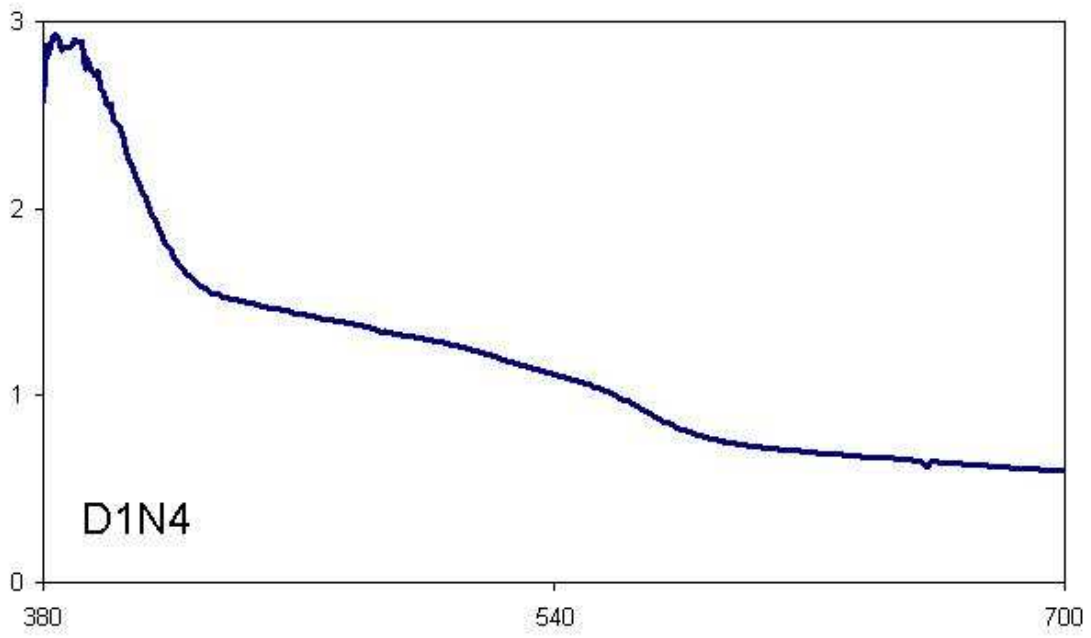

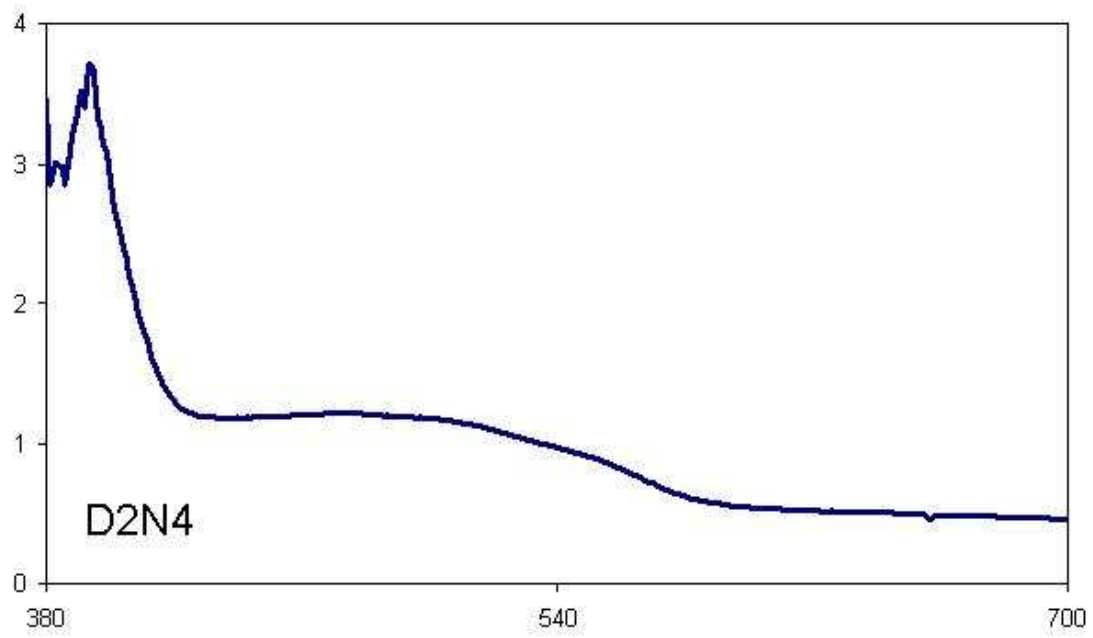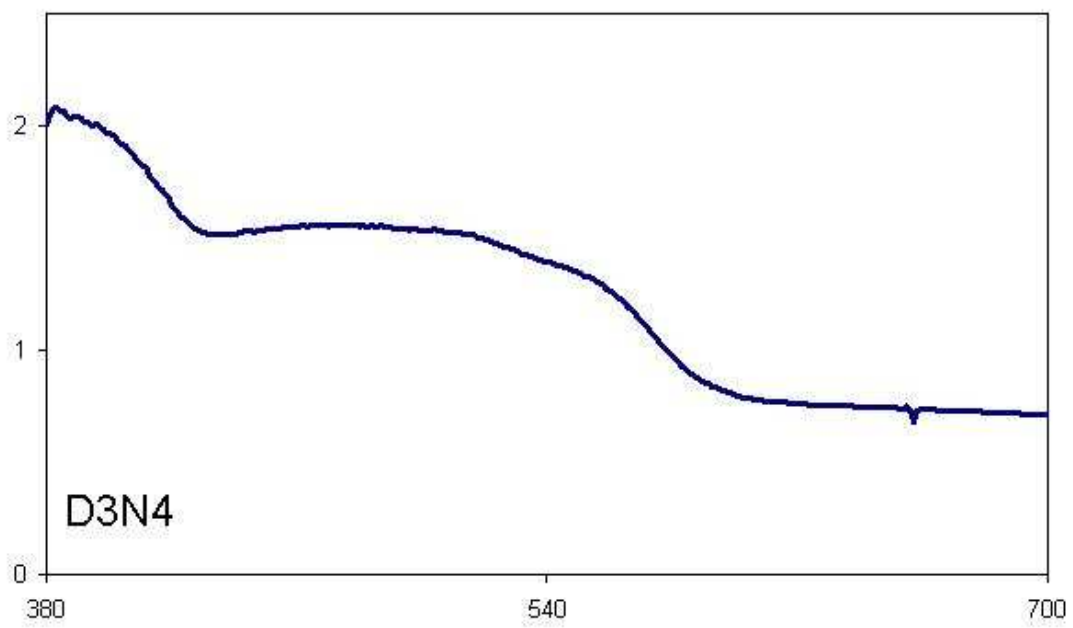

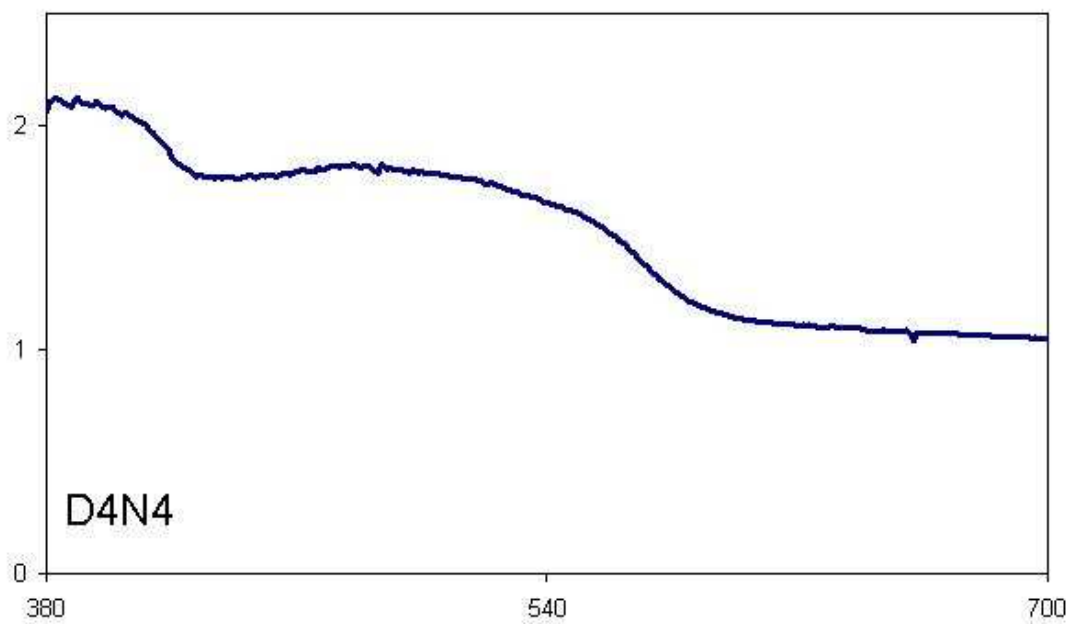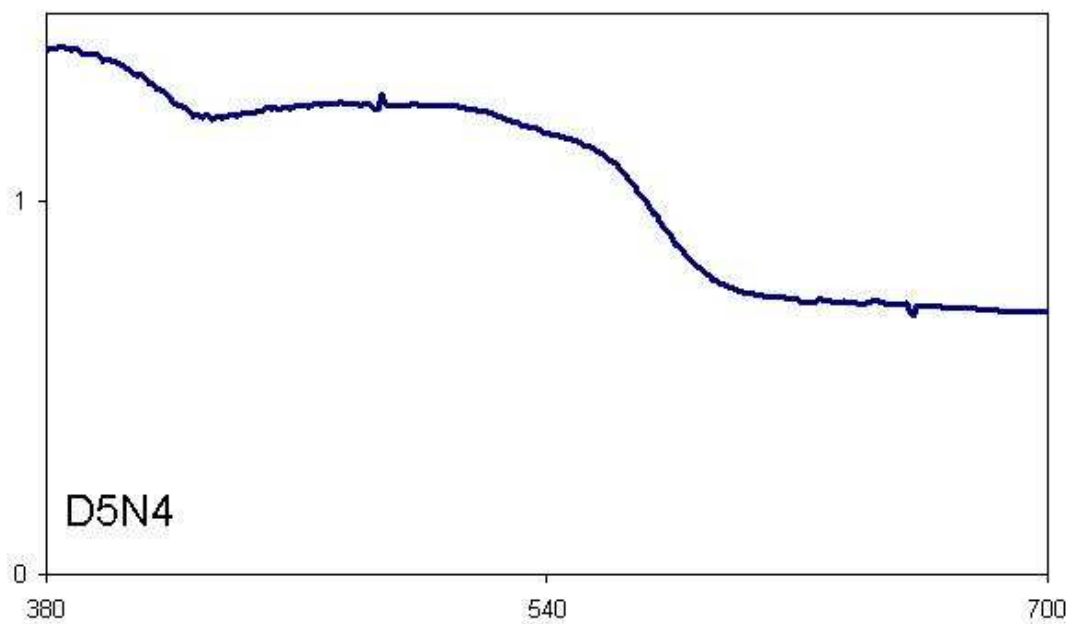

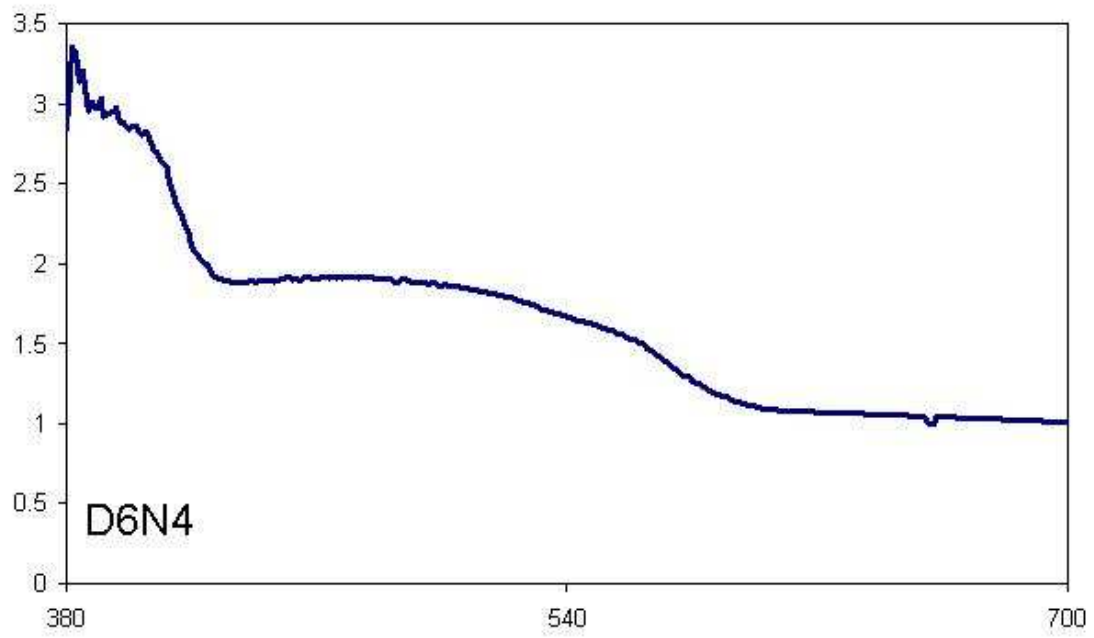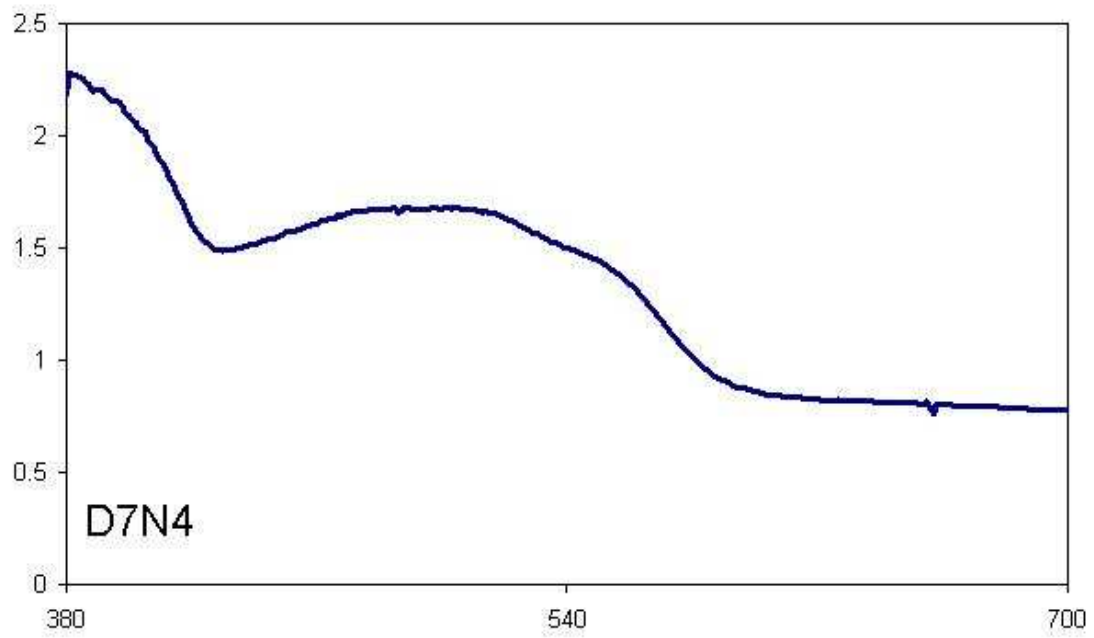

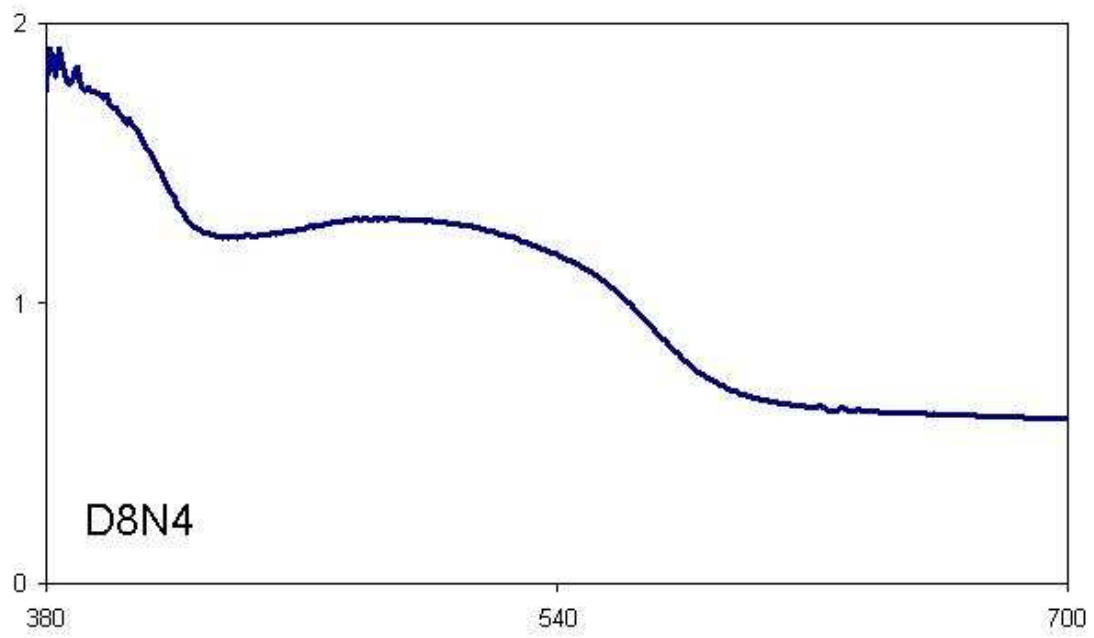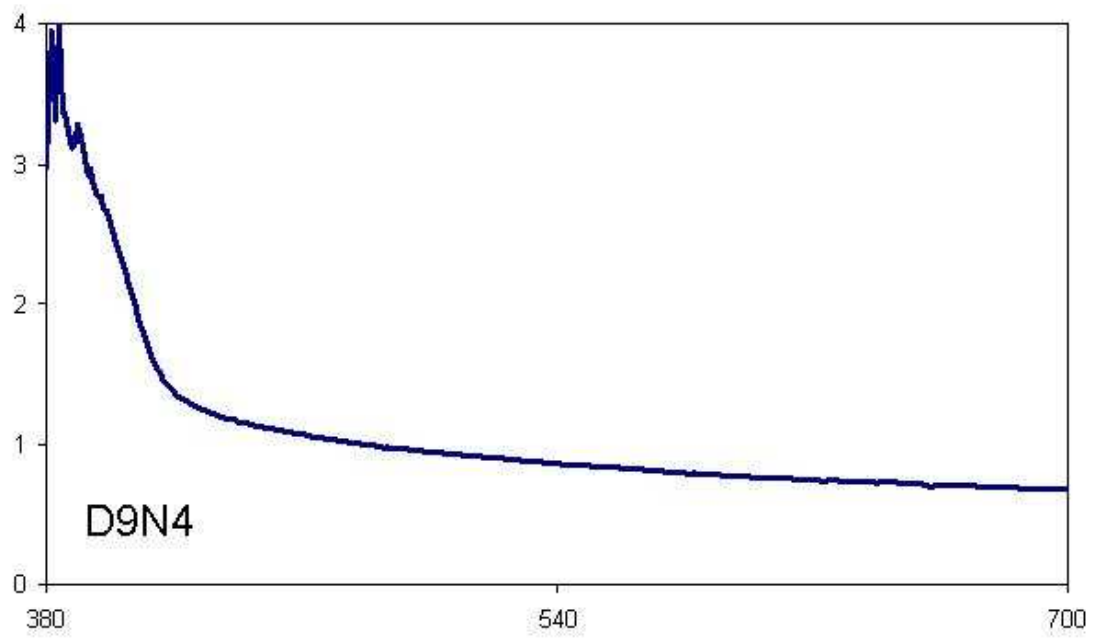



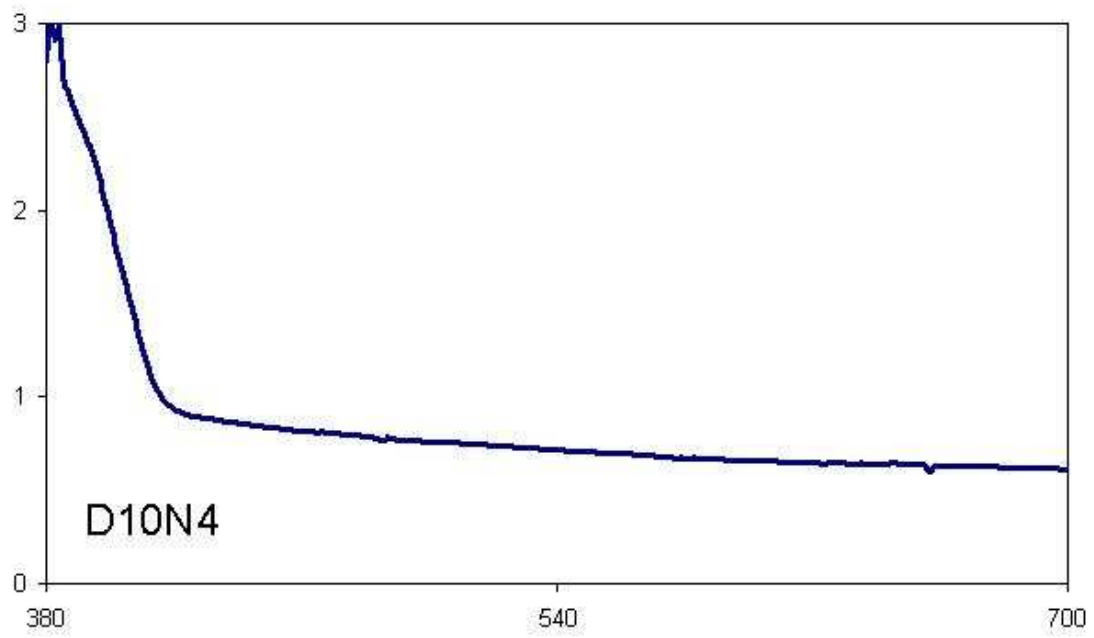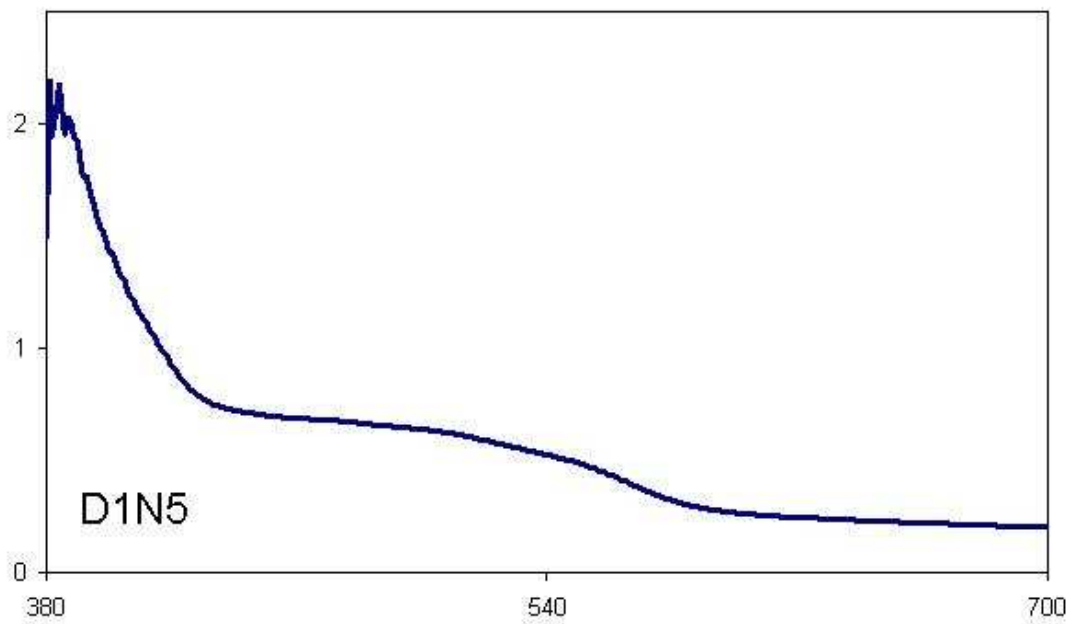

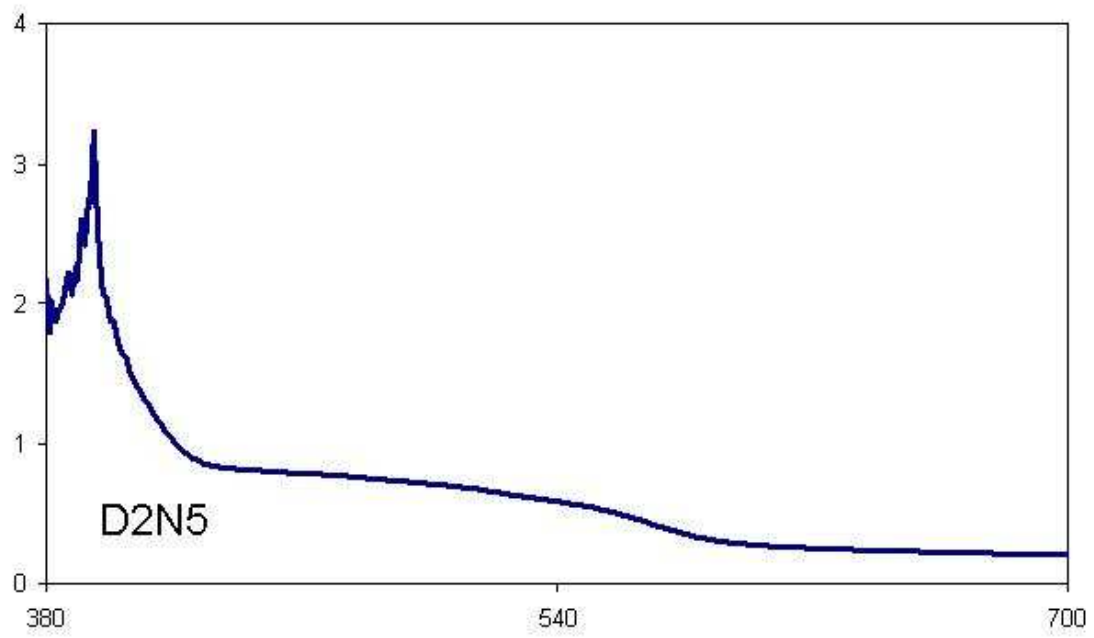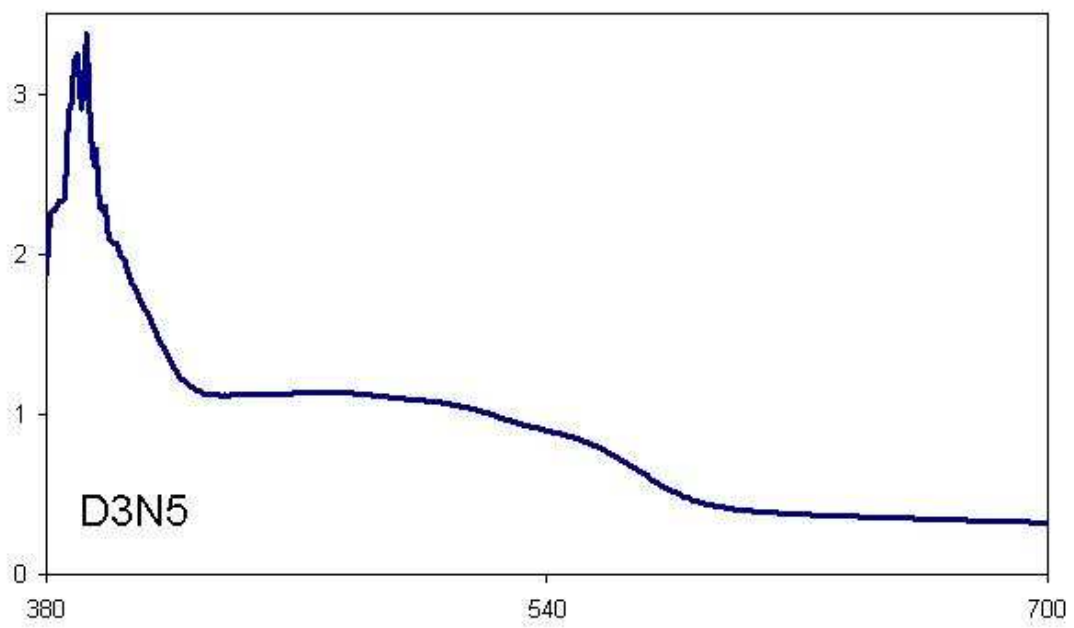

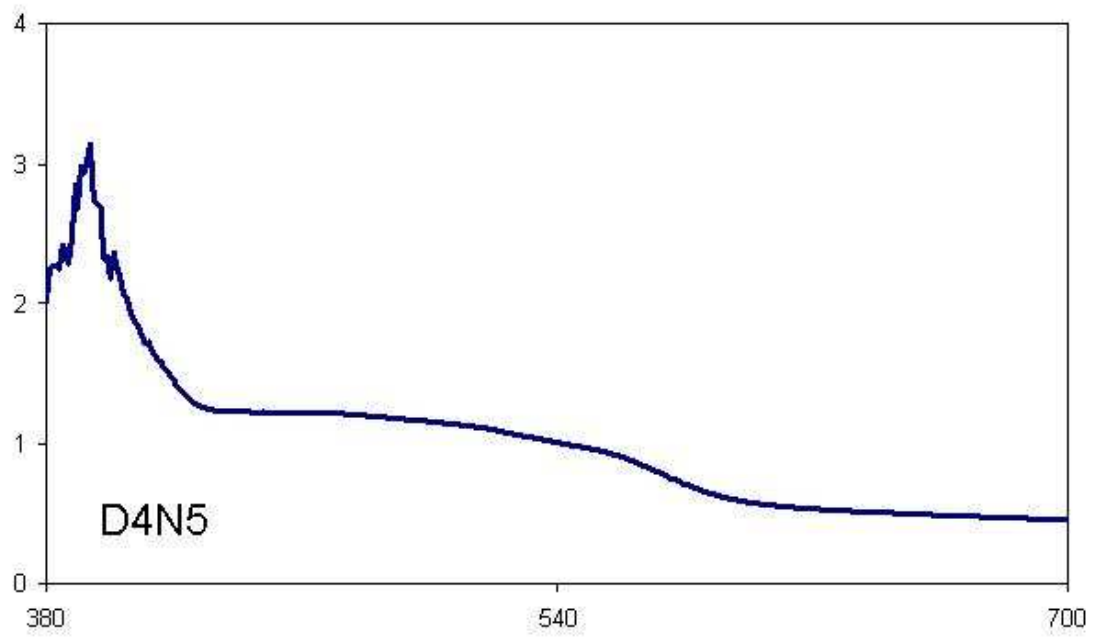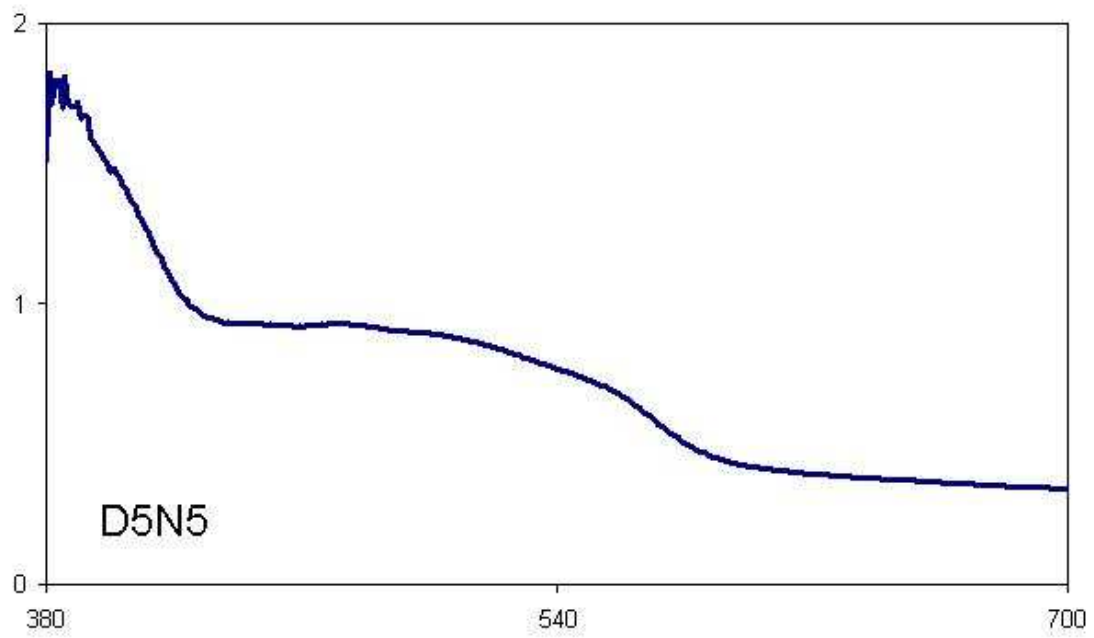

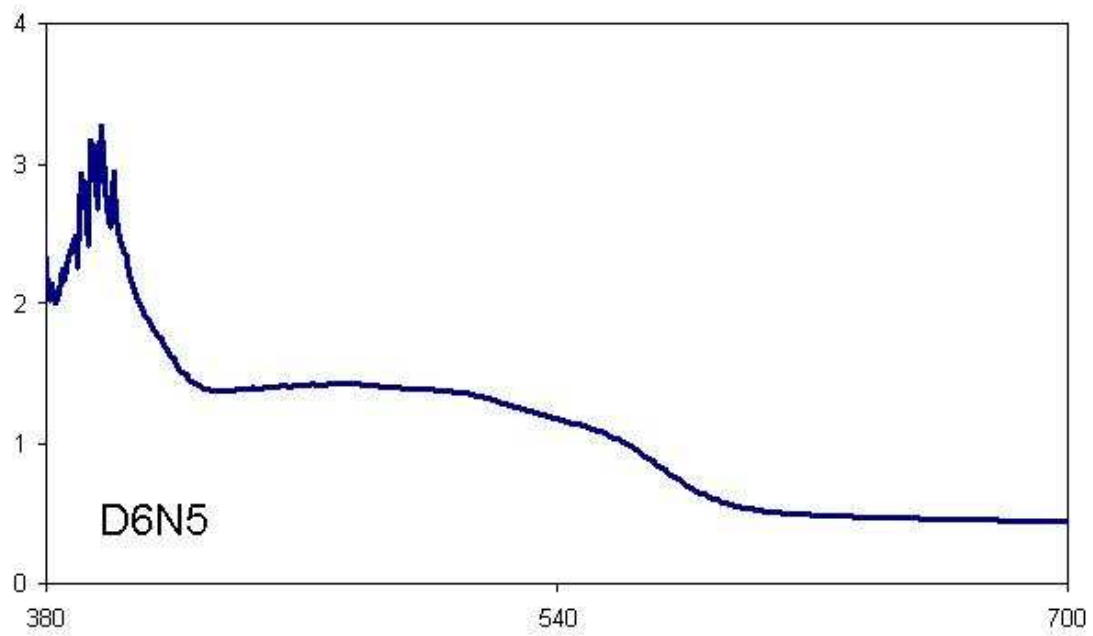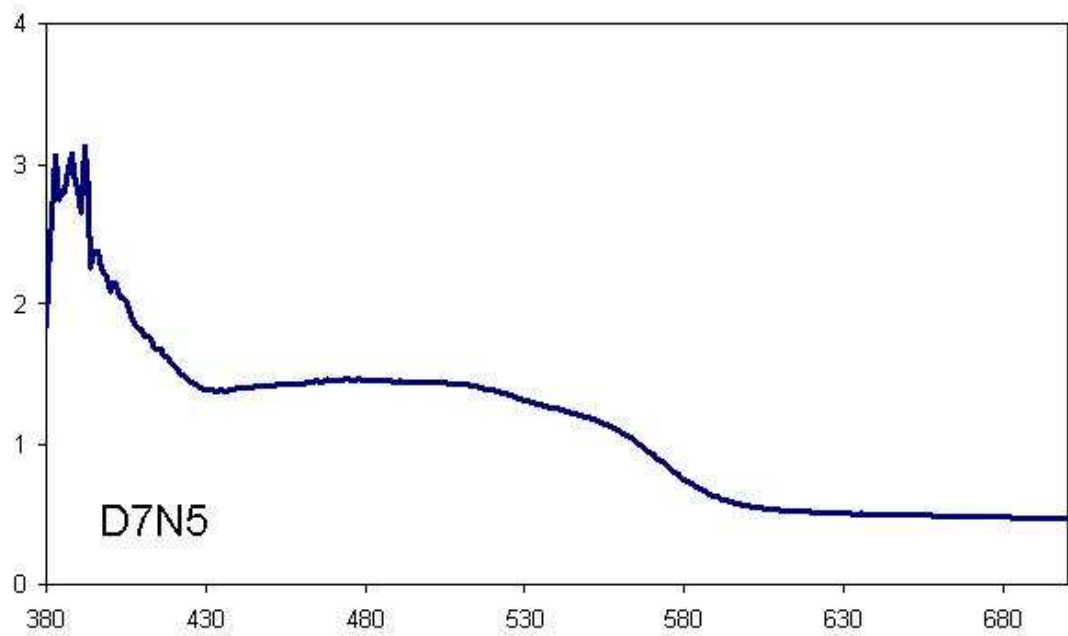

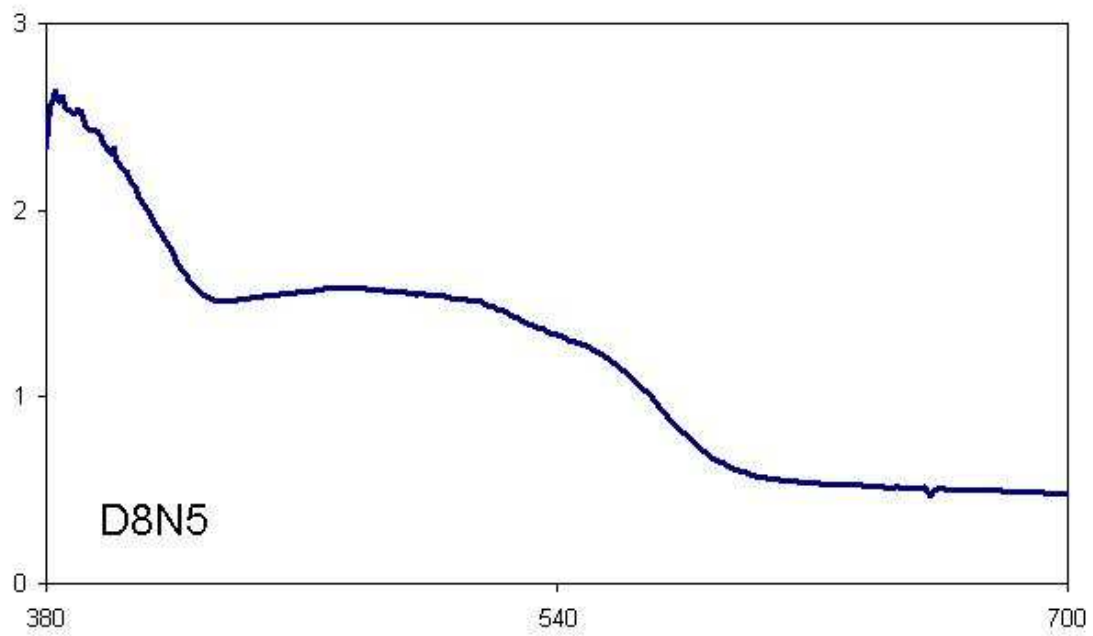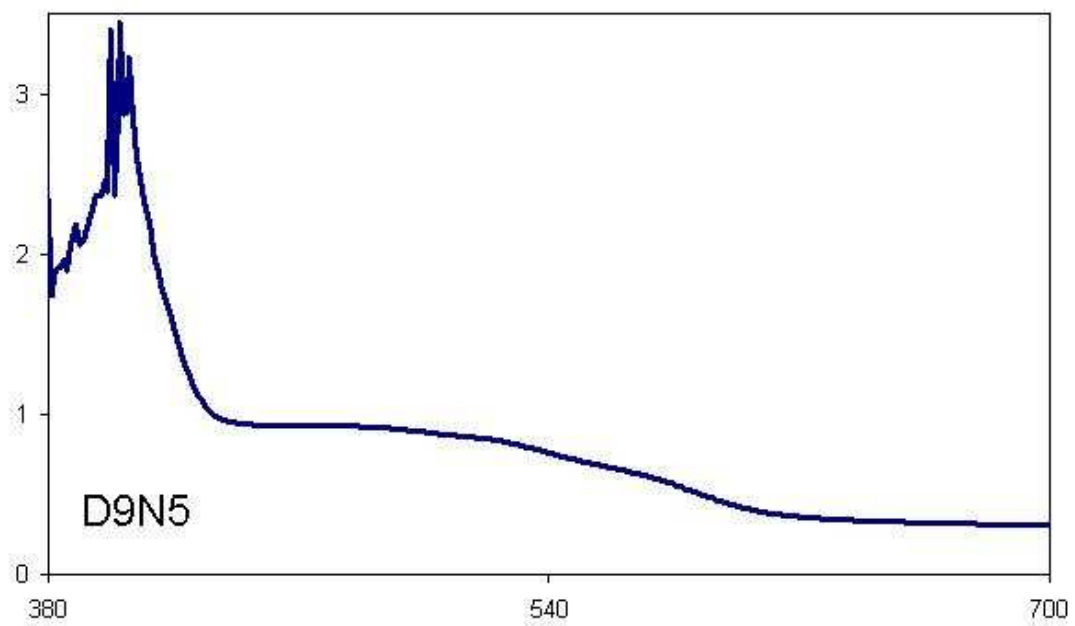

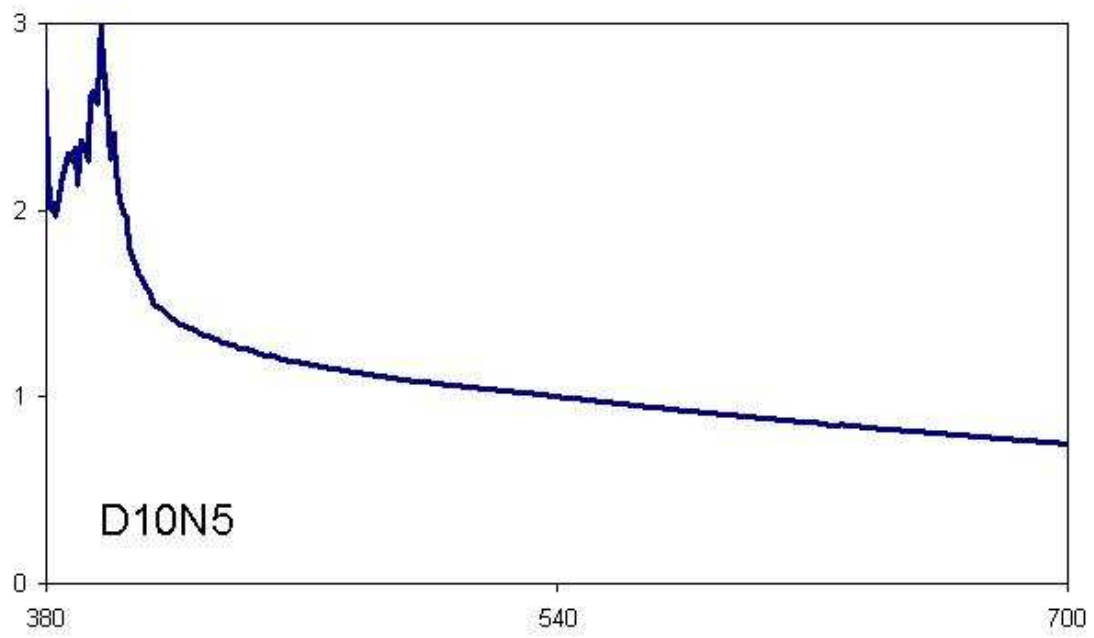

## References

1. Reczek, J. J.; Villazor, K. R.; Lynch, V.; Swager, T. M.; Iverson, B. L. *J. Am. Chem. Soc.* **2006**, *128* (24), 7995.
2. Pengo, P.; Pantos, G. D.; Otto, S.; Sanders, J. K. M. *J. Org. Chem.* **2006**, *71* (18), 7063.
